# Supplementary material for: Design and synthesis of 1,3-diphenylpyrimidine-2,4(1H,3H)-dione derivatives as antitumor agents via elevating ROS production to induce apoptosis
Source: Royal Society of Chemistry journal article supplement (doi:10.1039/d2nj01922a), 2022-01-01
Supplement: d2nj01922a1.pdf [file d2nj01922a1.pdf]

**Design and synthesis of 1,3-diphenylpyrimidine-2,4(1*H*,3*H*)-dione derivatives as  
antitumor agents via elevating ROS production to induce apoptosis**

Qian Xie<sup>a</sup>, Yanni Shen<sup>a</sup>, Jianhui Liang<sup>a</sup>, Chao Zhang<sup>a</sup>, Xianwu Ling<sup>a</sup>, Liangxiao Gu<sup>a</sup>, Yiling Wang<sup>a</sup>, Yan  
Wang<sup>b</sup>, Xiaoping Liu\*<sup>a</sup> and Chun Hu\*<sup>a</sup>

<sup>a</sup> Key Laboratory of Structure-based Drug Design & Discovery, Ministry of Education, School of Pharmaceutical Engineering, Shenyang Pharmaceutical University, 110016, China.

<sup>b</sup> Center for Translational Medicine Research and Development, Shenzhen Institute of Advanced Technology, Chinese Academy of Sciences, Shenzhen 518055, China.

\* Correspondences: Xiaoping Liu ([lxp19730107@163.com](mailto:lxp19730107@163.com)) and Chun Hu ([chunhu@syphu.edu.cn](mailto:chunhu@syphu.edu.cn)) Tel.: +86-24-43520246 (X. L. and C. H.).

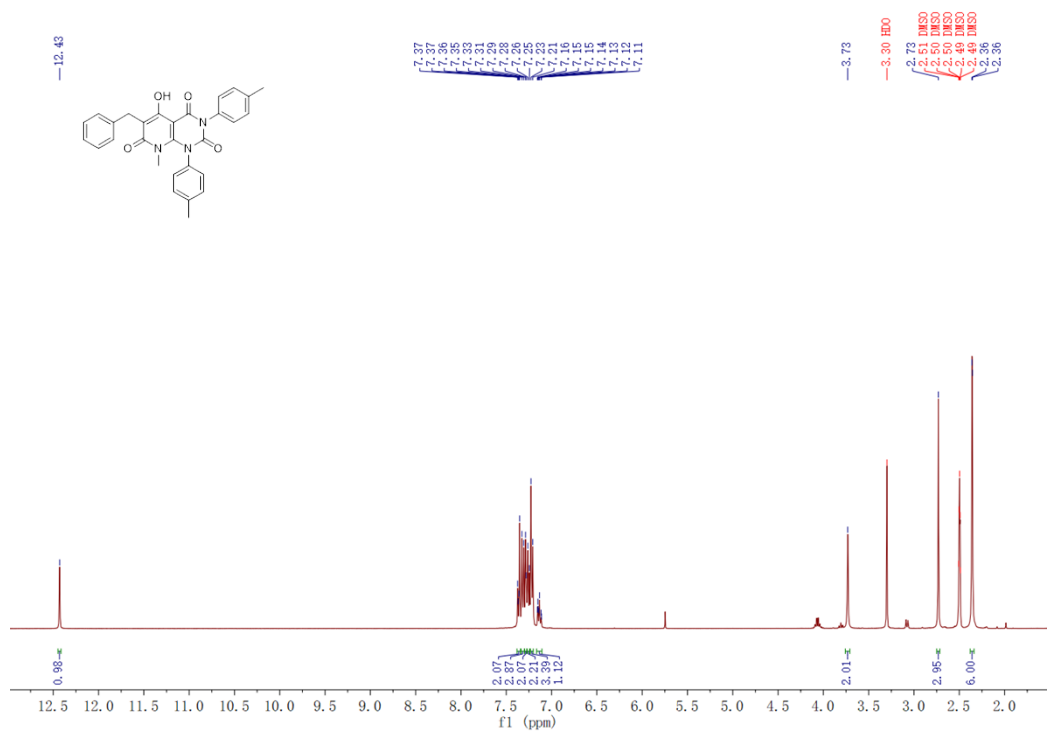

<sup>1</sup>H NMR spectra of compound XS01

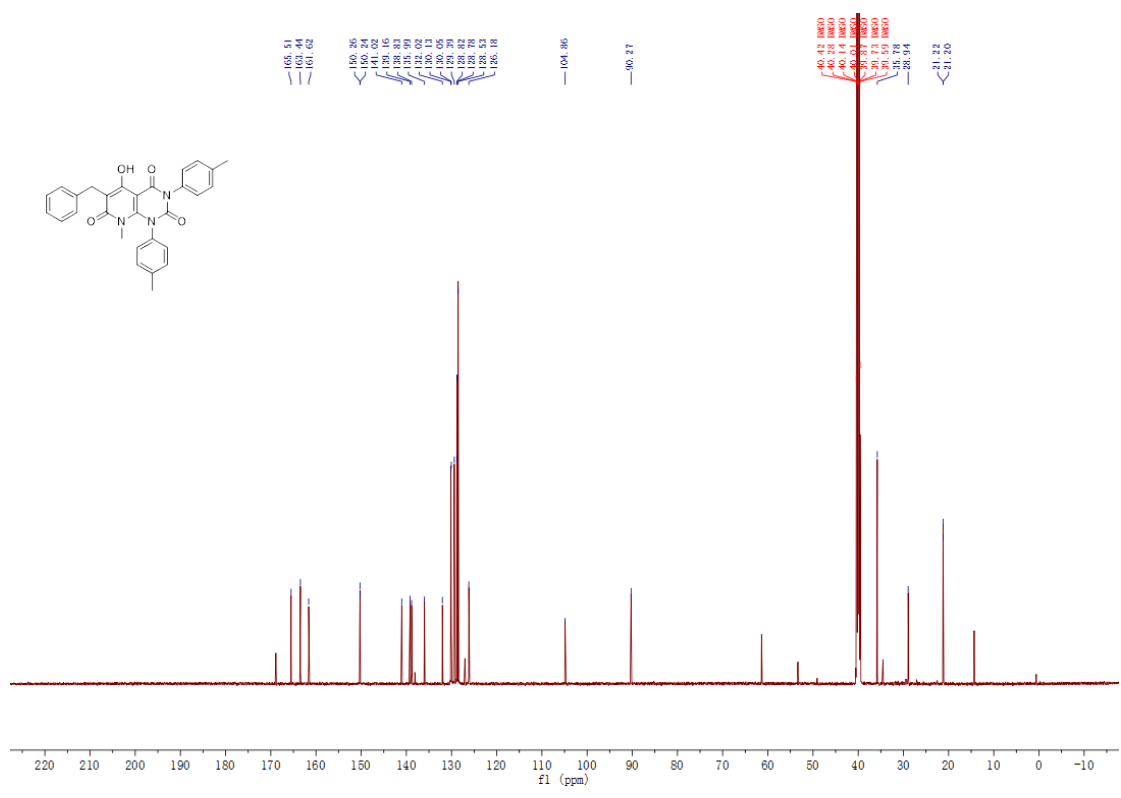

<sup>13</sup>C NMR spectra of compound XS01

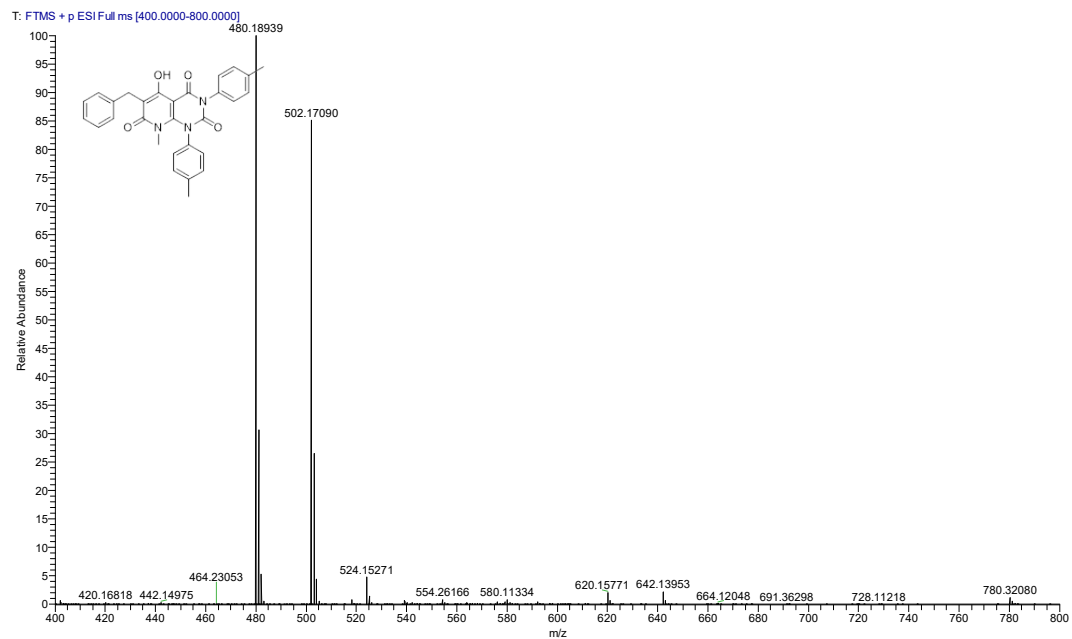

ESI-HRMS spectra of compound **XS01**

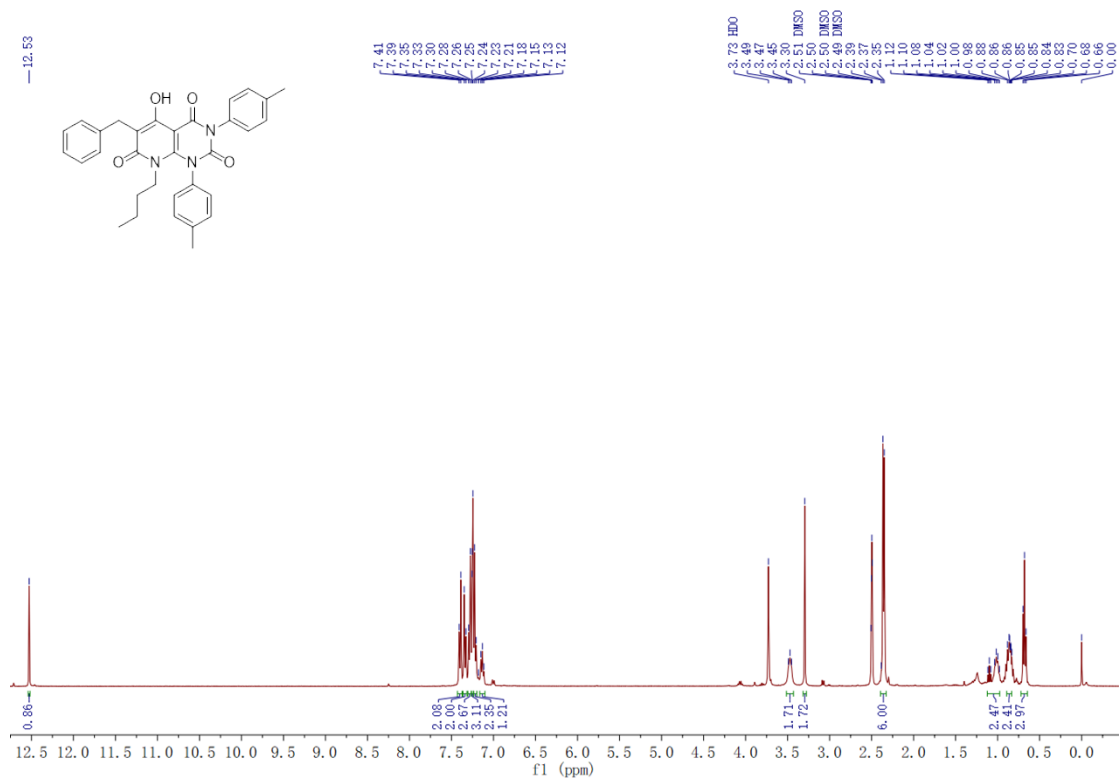

<sup>1</sup>H NMR spectra of compound **XS02**

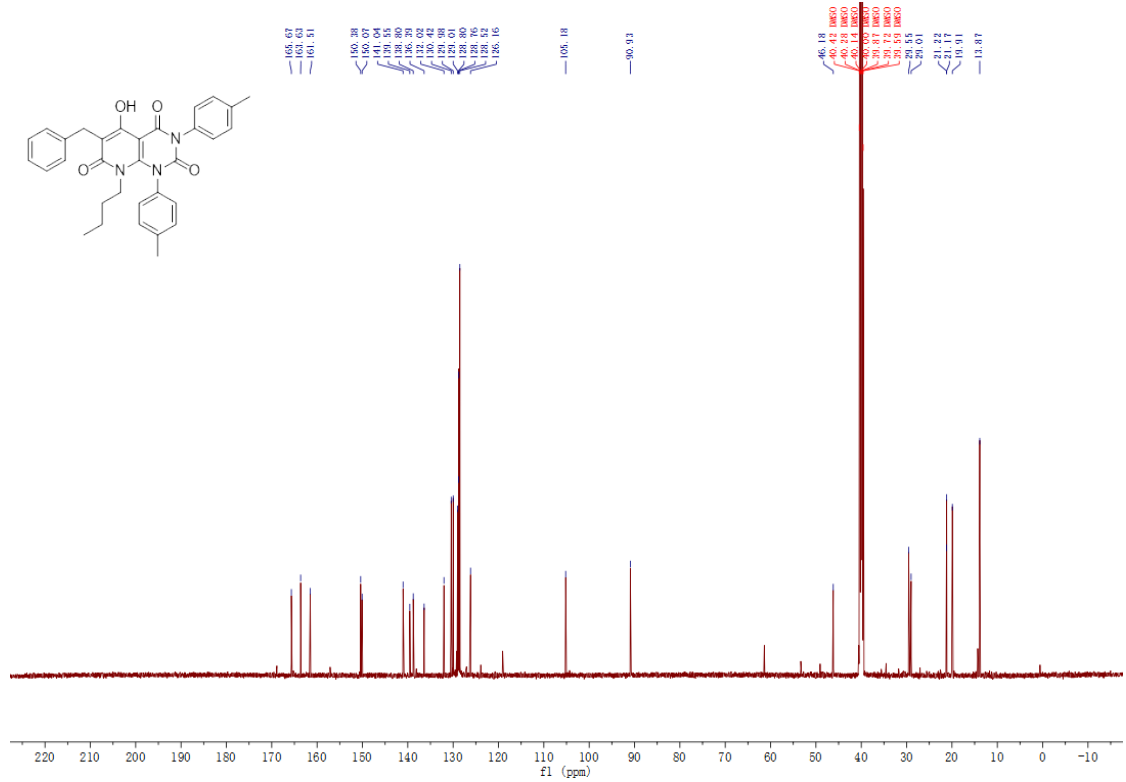

$^{13}\text{C}$  NMR spectra of compound XS02

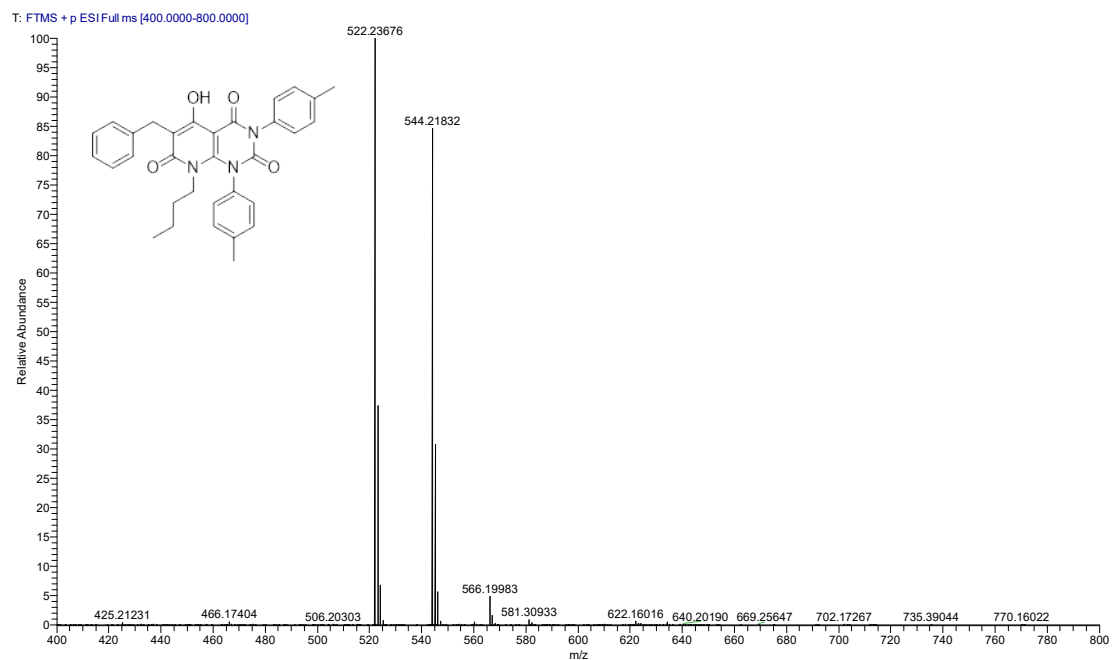

ESI-HRMS spectra of compound XS02

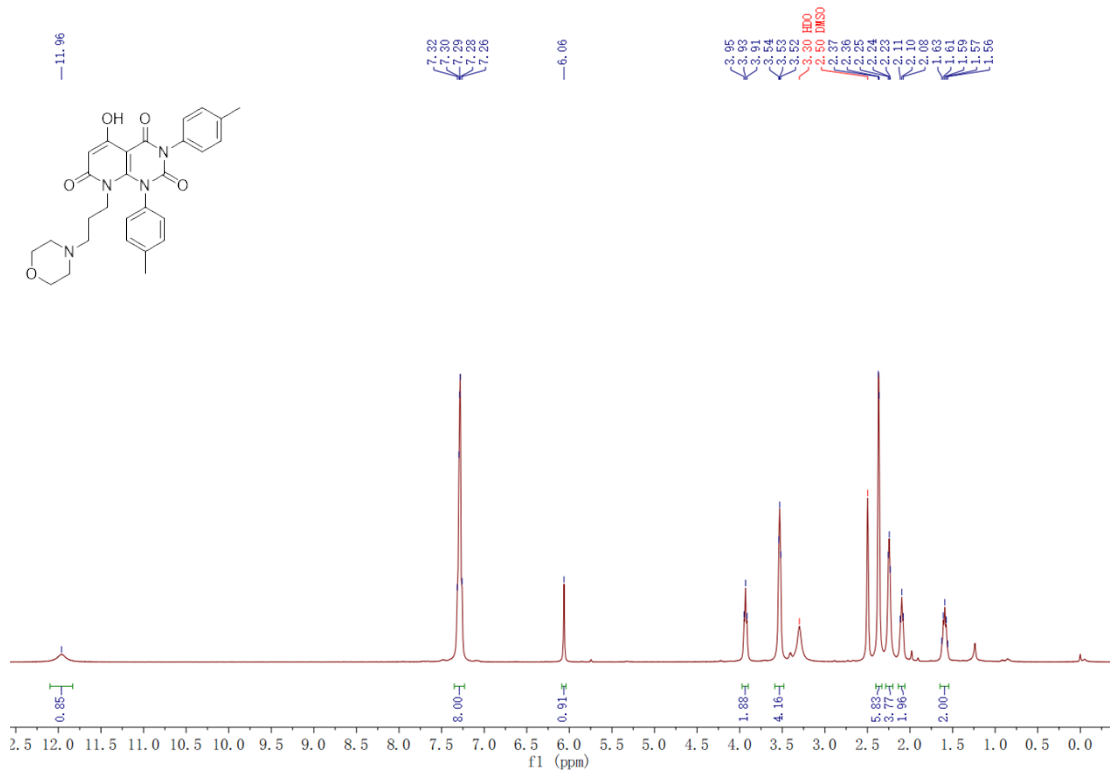

<sup>1</sup>H NMR spectra of compound XS03

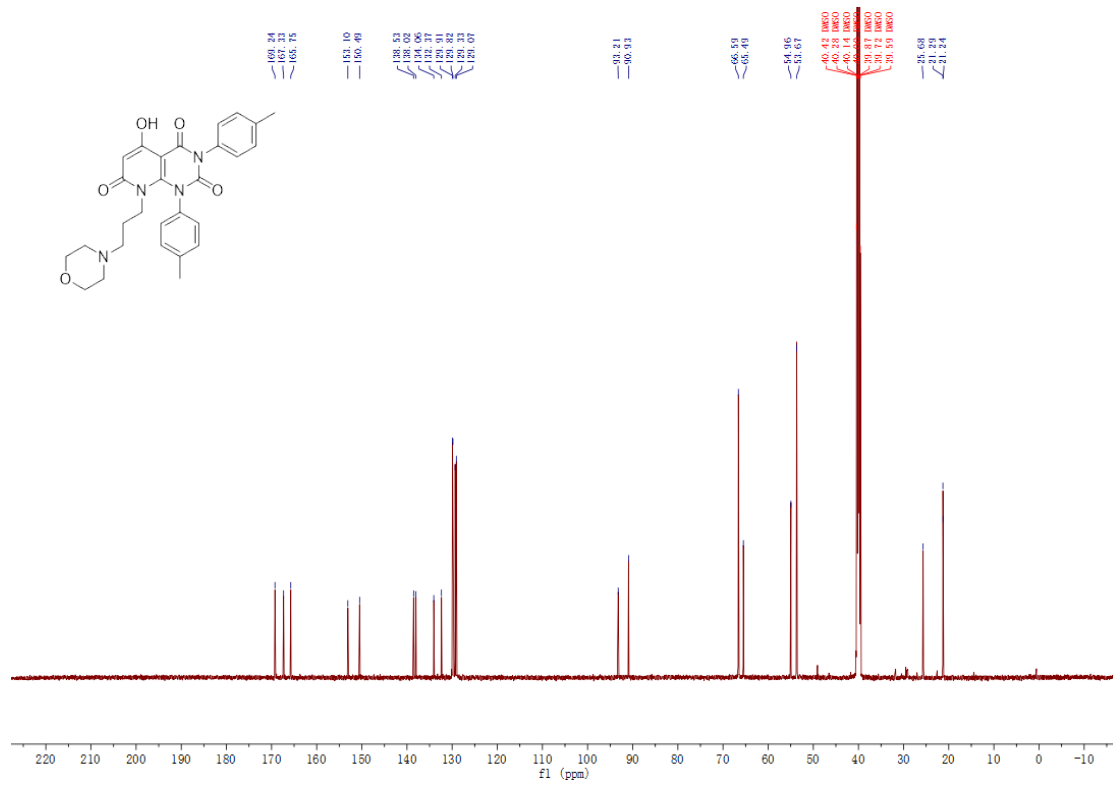

<sup>13</sup>C NMR spectra of compound XS03

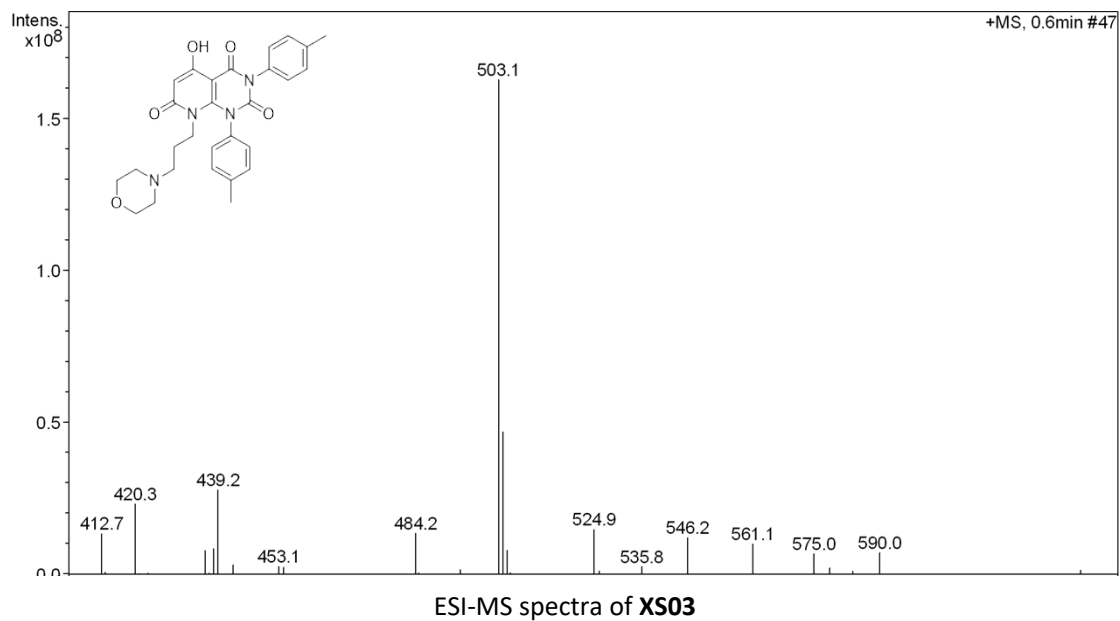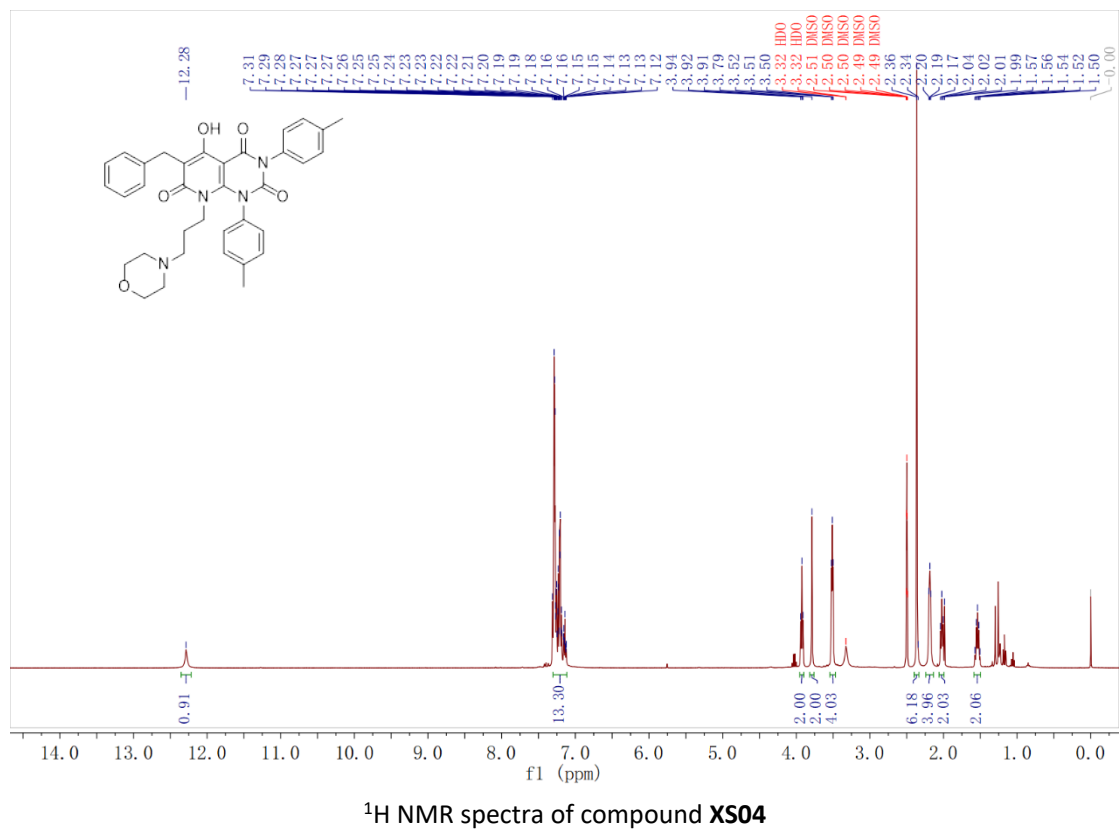

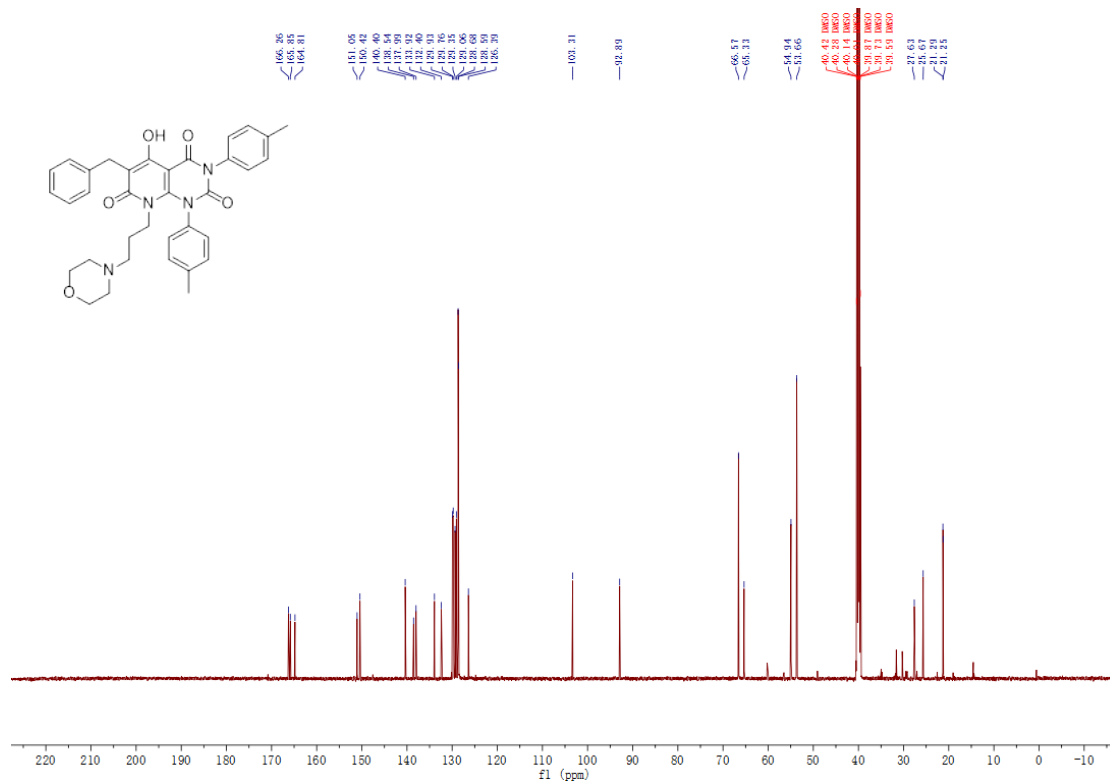

<sup>13</sup>C NMR spectra of compound XS04

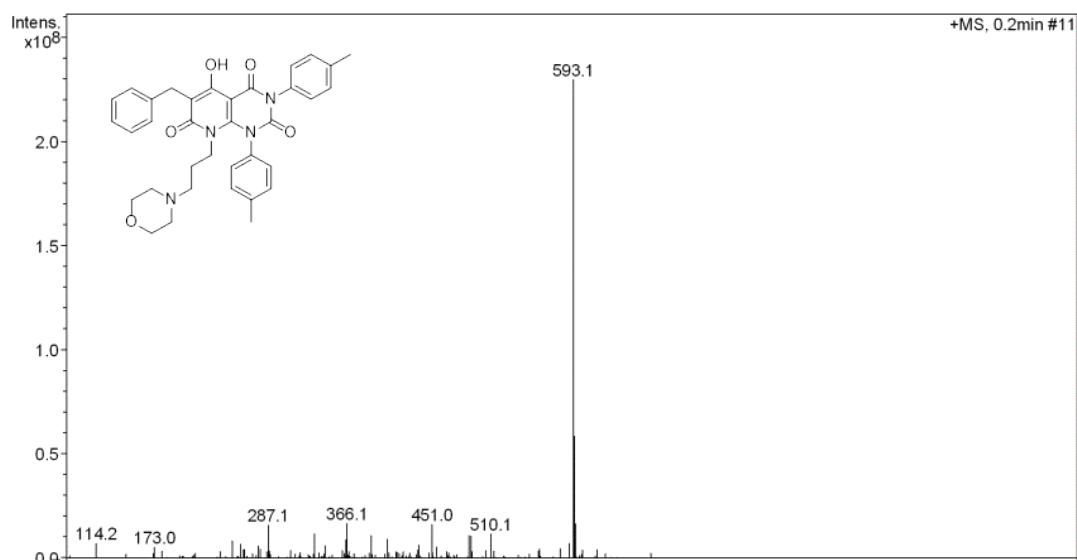

ESI-MS spectra of compound XS04

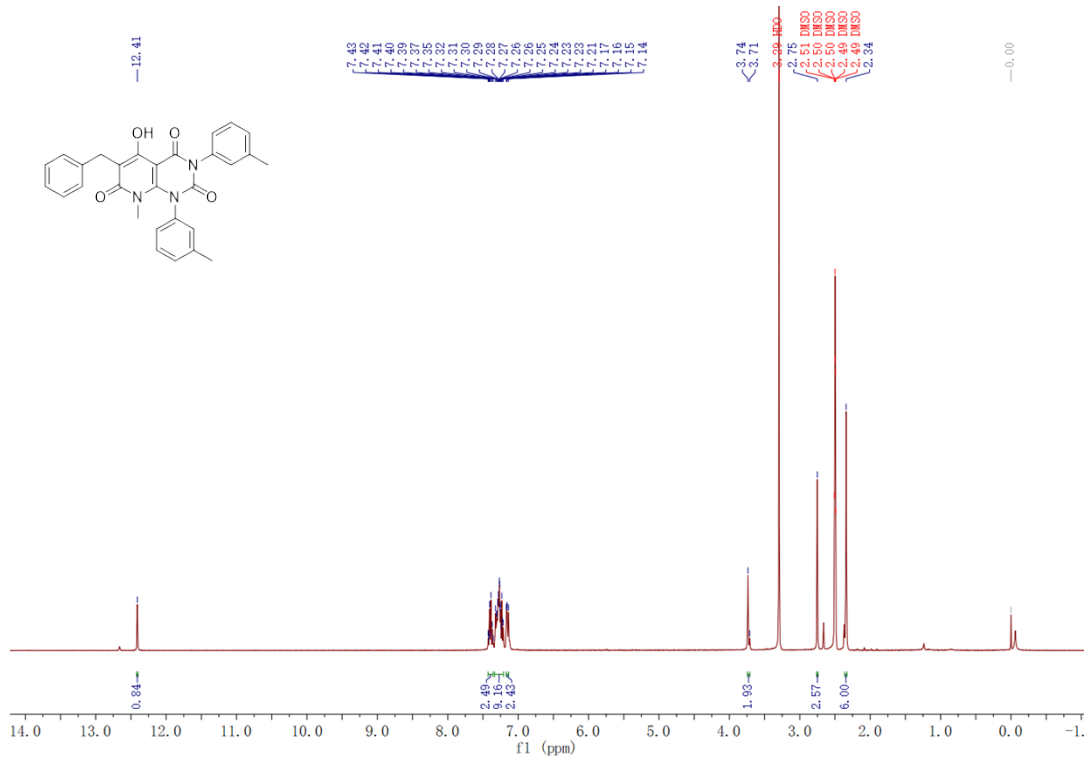

<sup>1</sup>H NMR spectra of compound XS05

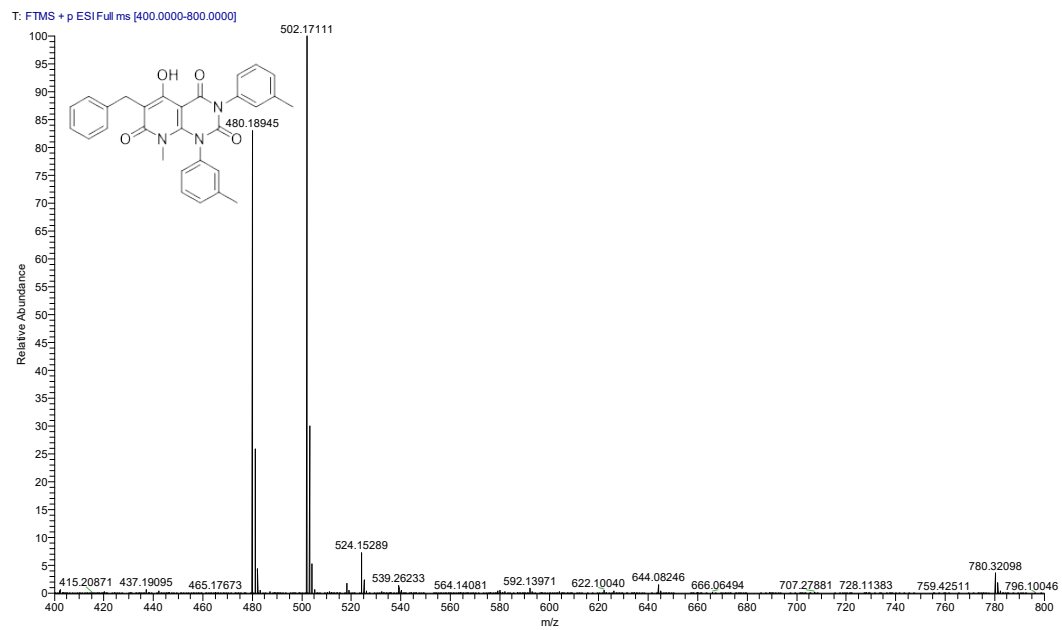

ESI-HRMS spectra of compound XS05



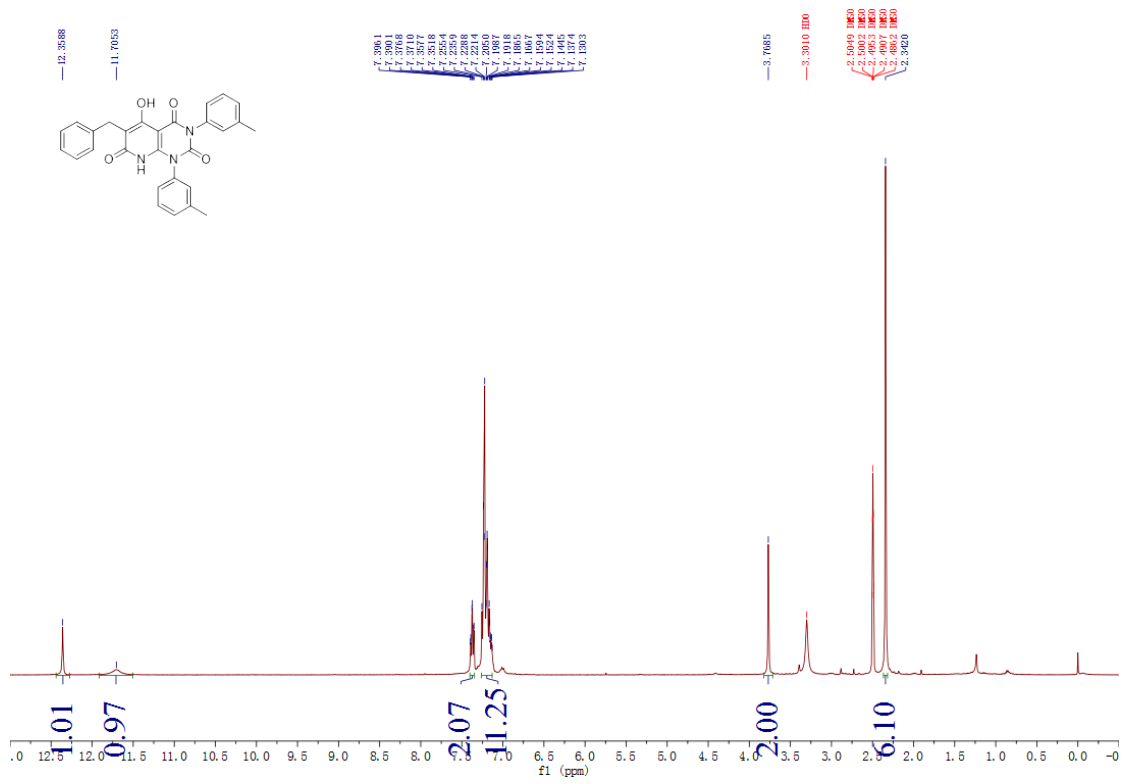

<sup>1</sup>H NMR spectra of compound XS06

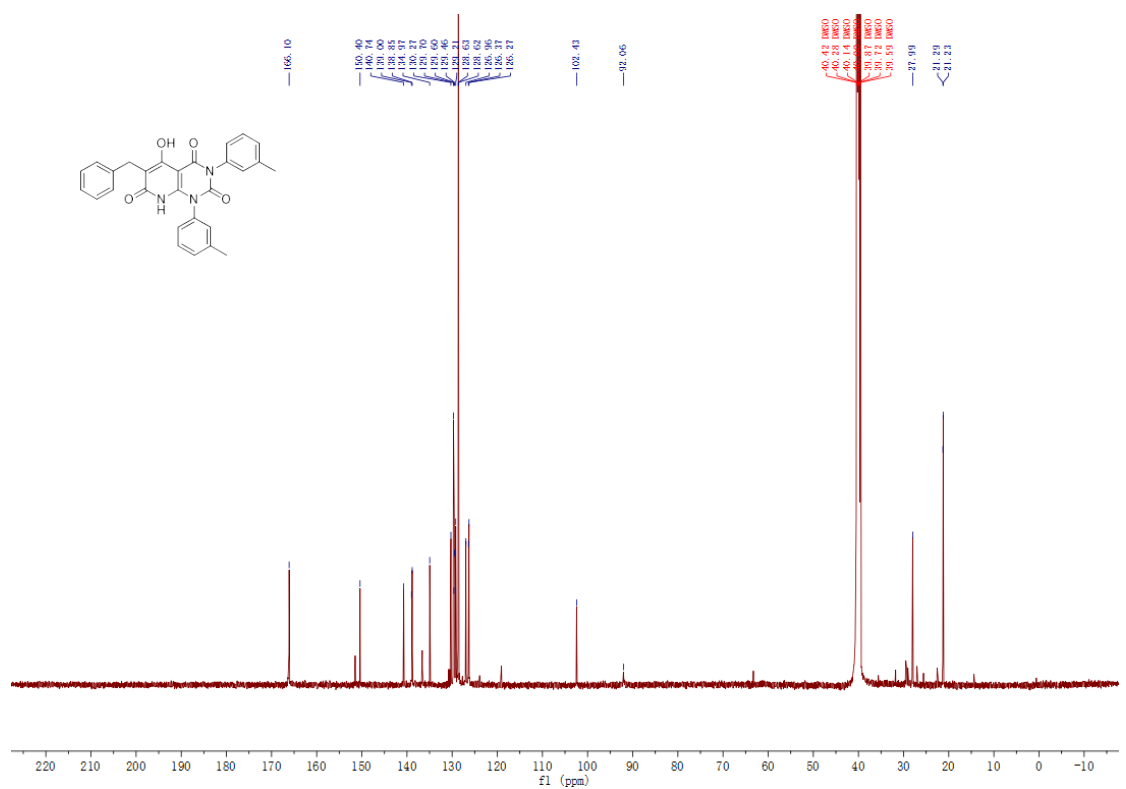

<sup>13</sup>C NMR spectra of compound XS06

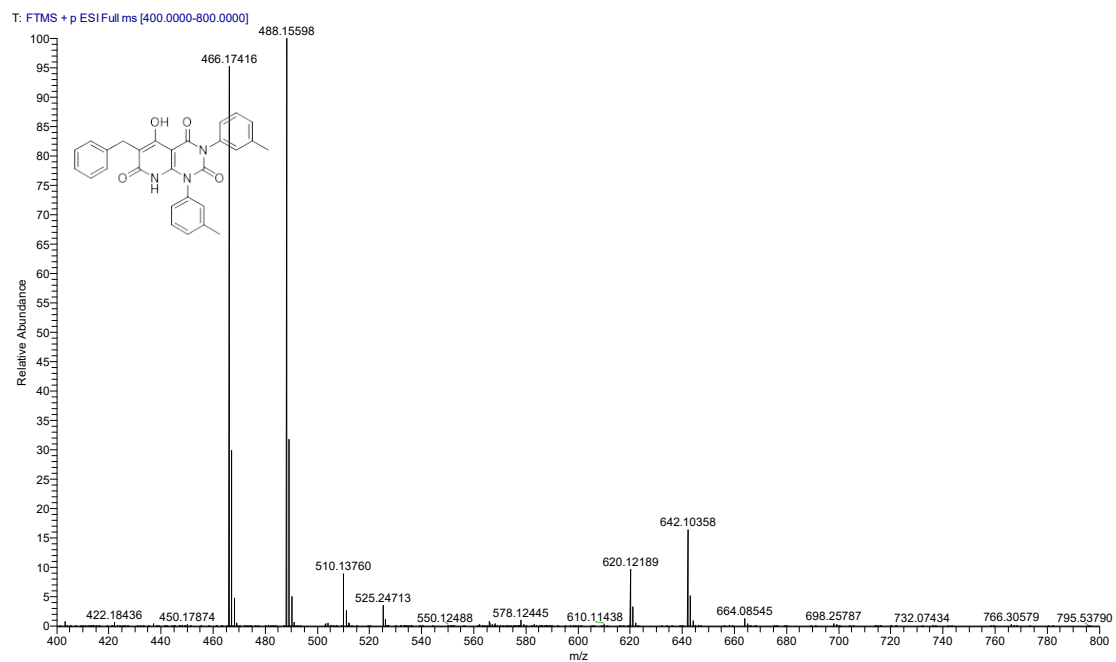

ESI-HRMS spectra of compound **XS06**

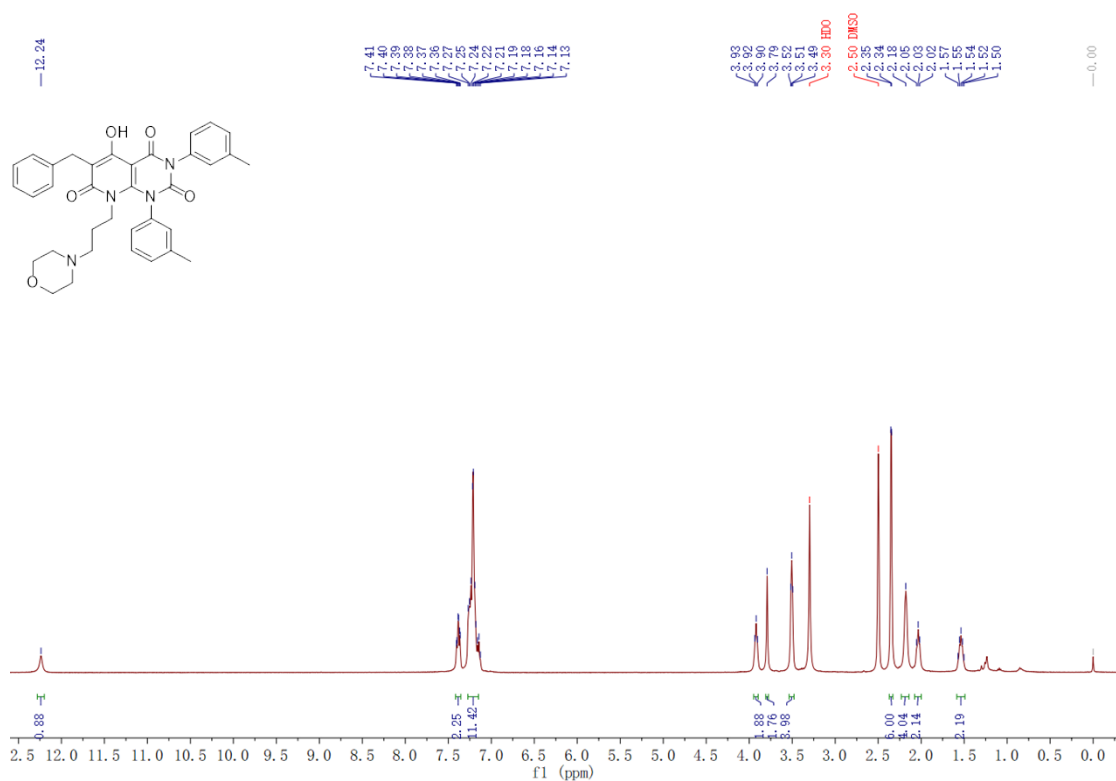

<sup>1</sup>H NMR spectra of compound **XS07**

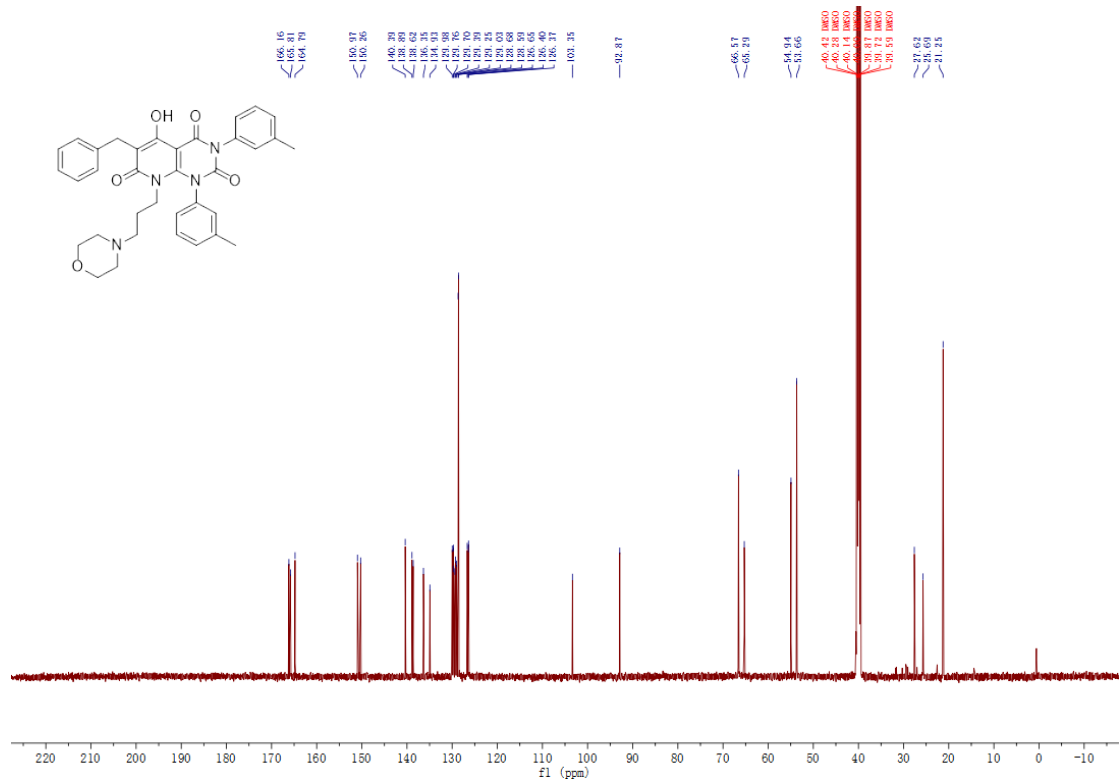

<sup>13</sup>C NMR spectra of compound XS07

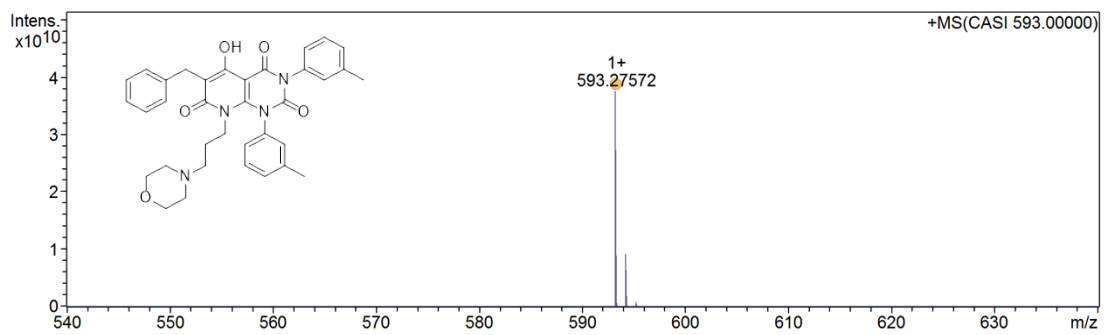

ESI-HRMS spectra of compound XS07

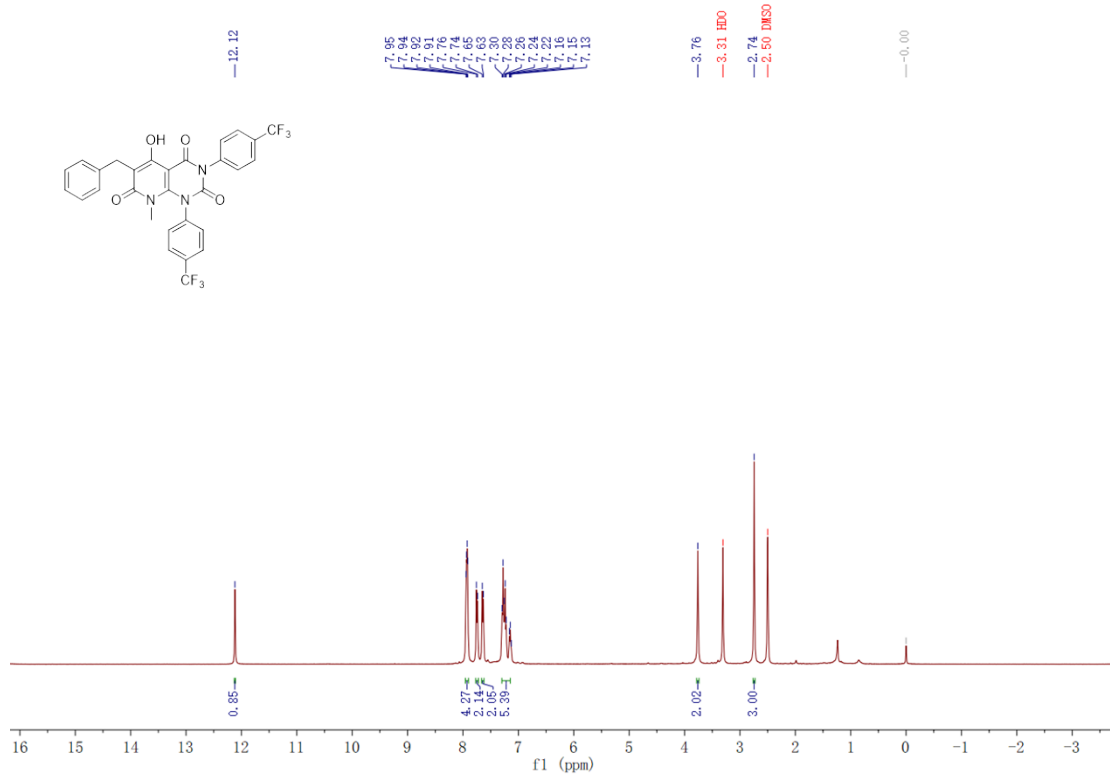

<sup>1</sup>H NMR spectra of compound XS08

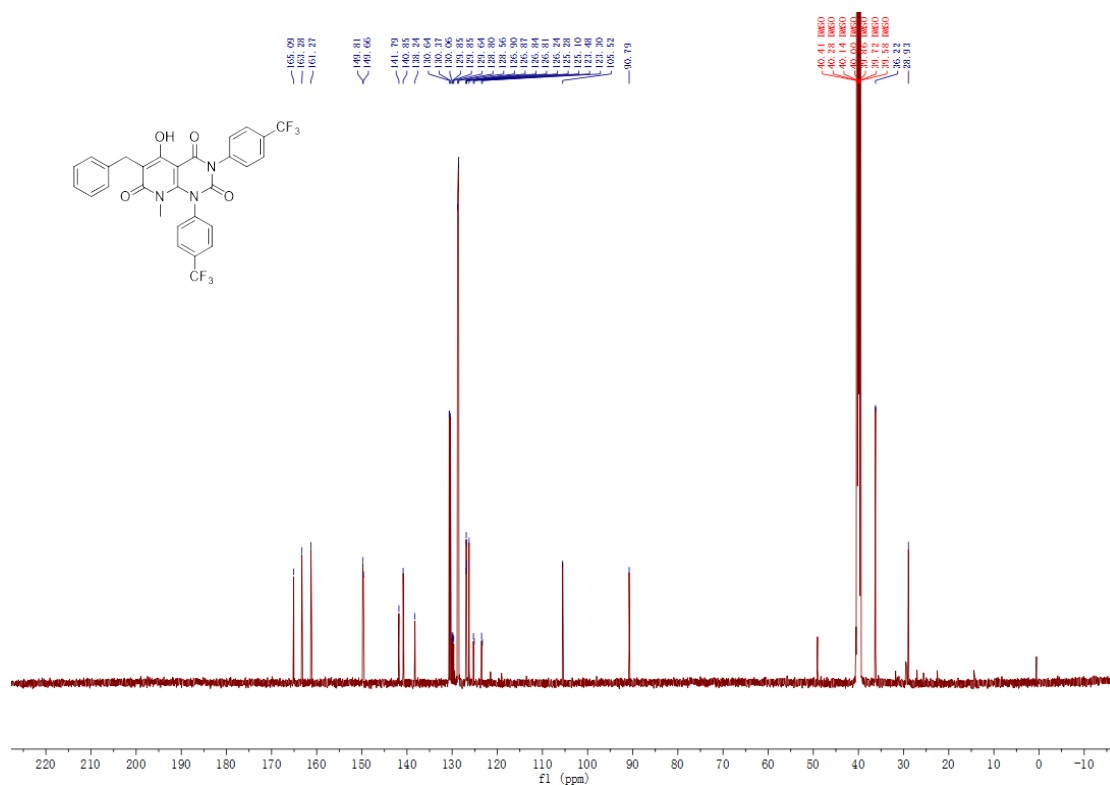

<sup>13</sup>C NMR spectra of compound XS08

T: FTMS + p ESI Full ms [400.0000-800.0000]

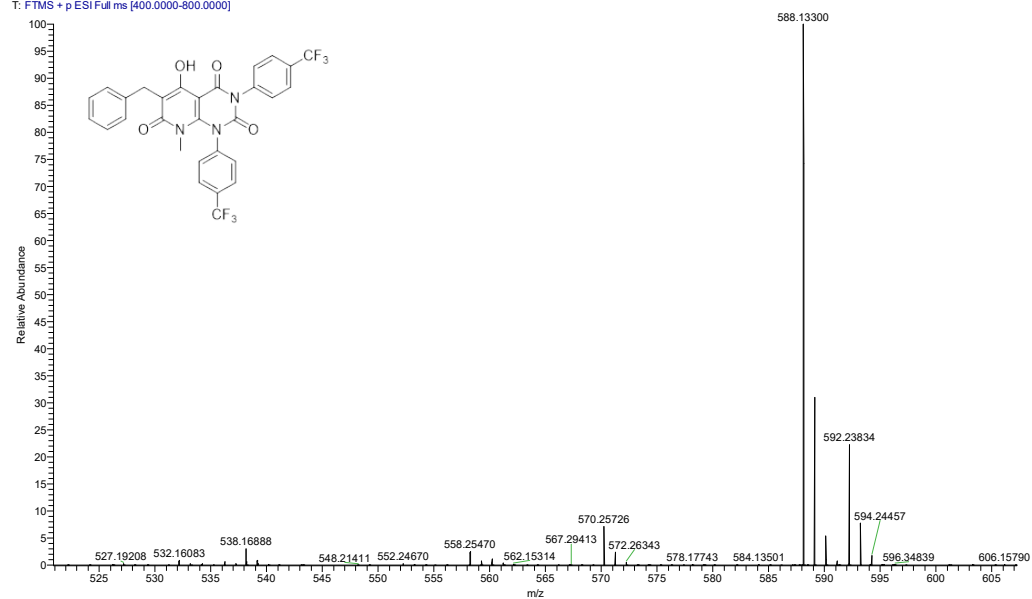

ESI-HRMS spectra of compound XS08

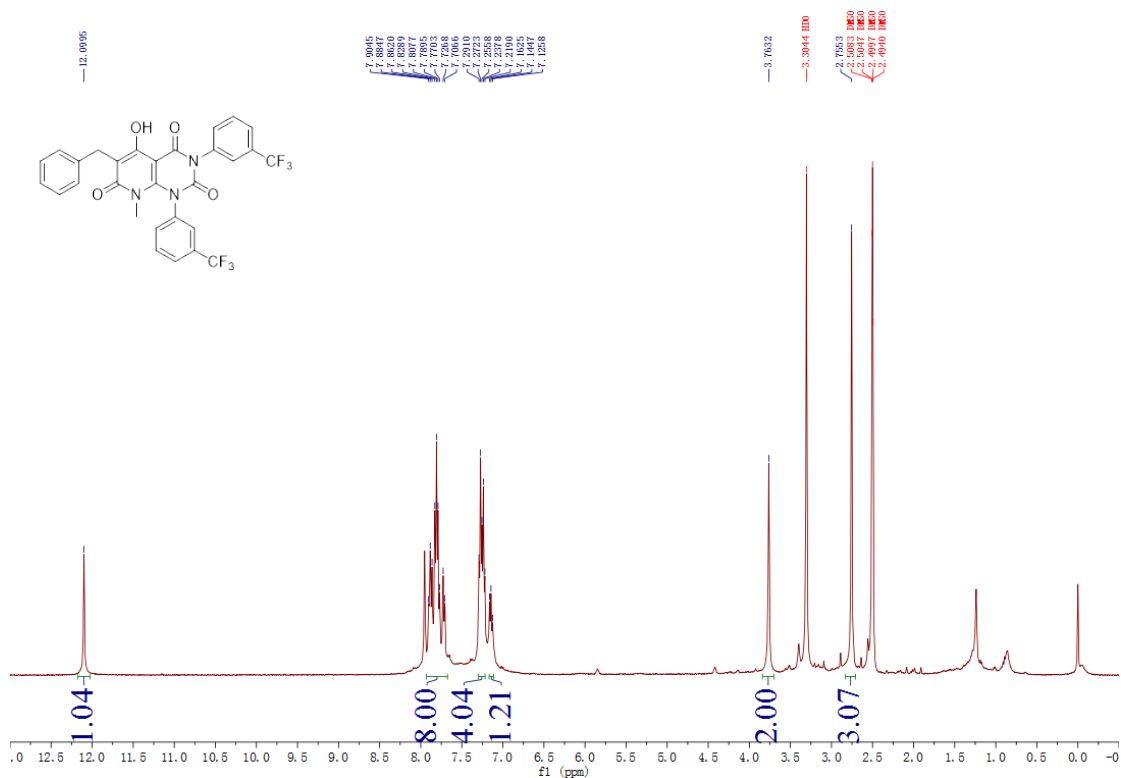

<sup>1</sup>H NMR spectra of compound XS09

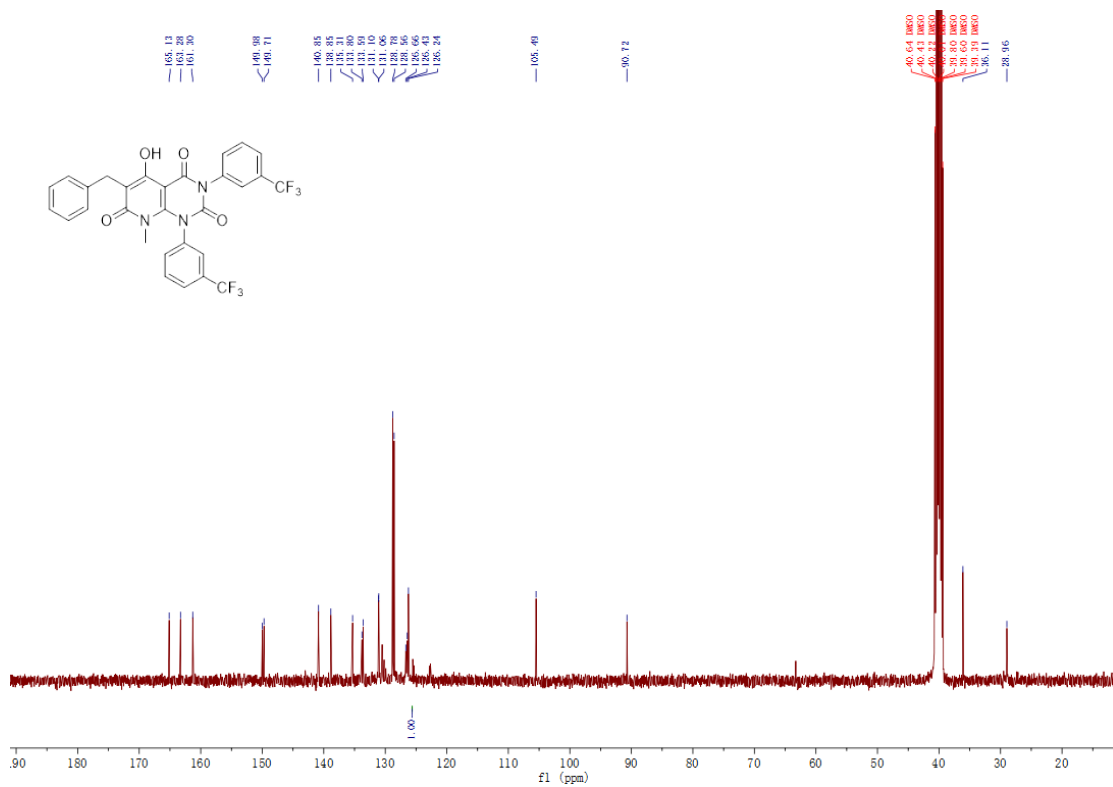

<sup>13</sup>C NMR spectra of compound XS09

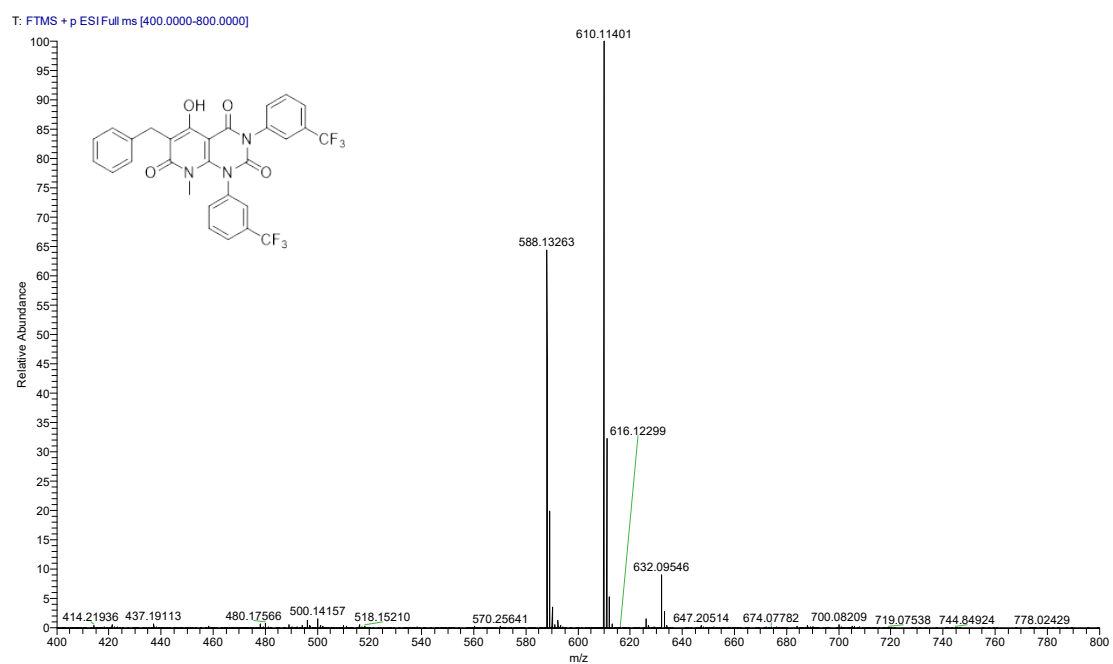

ESI-HRMS spectra of compound XS09

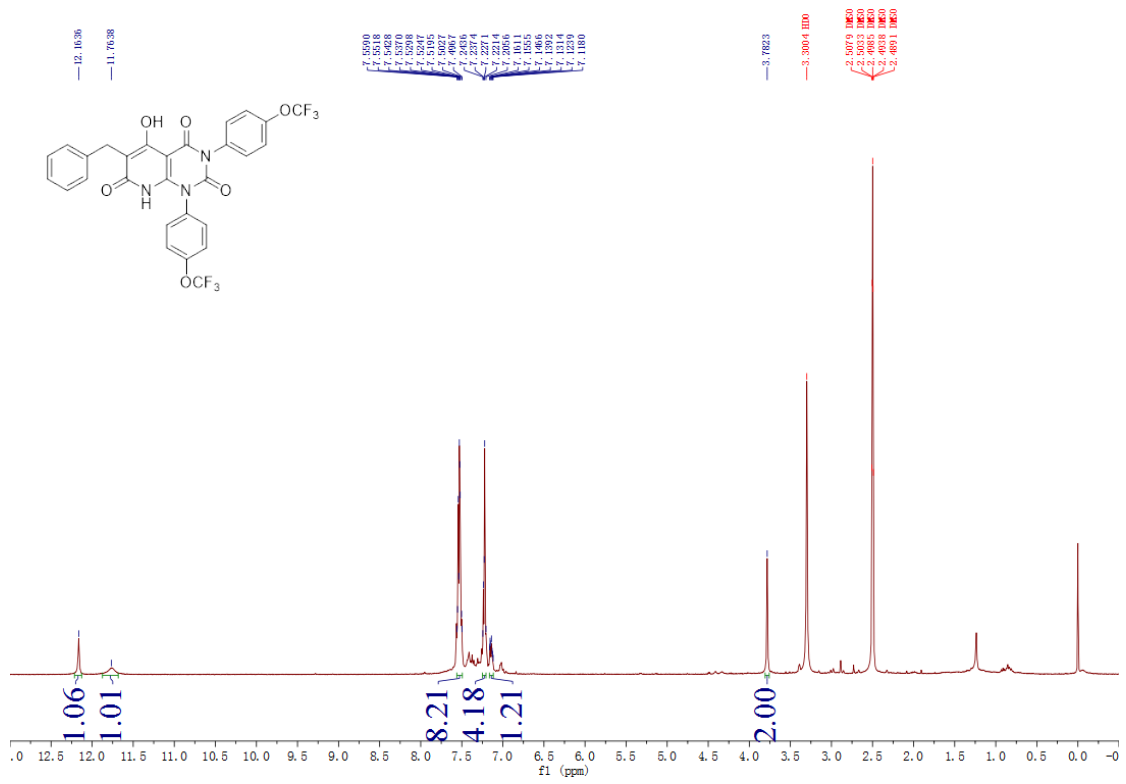

**<sup>1</sup>H NMR spectra of compound XS10**

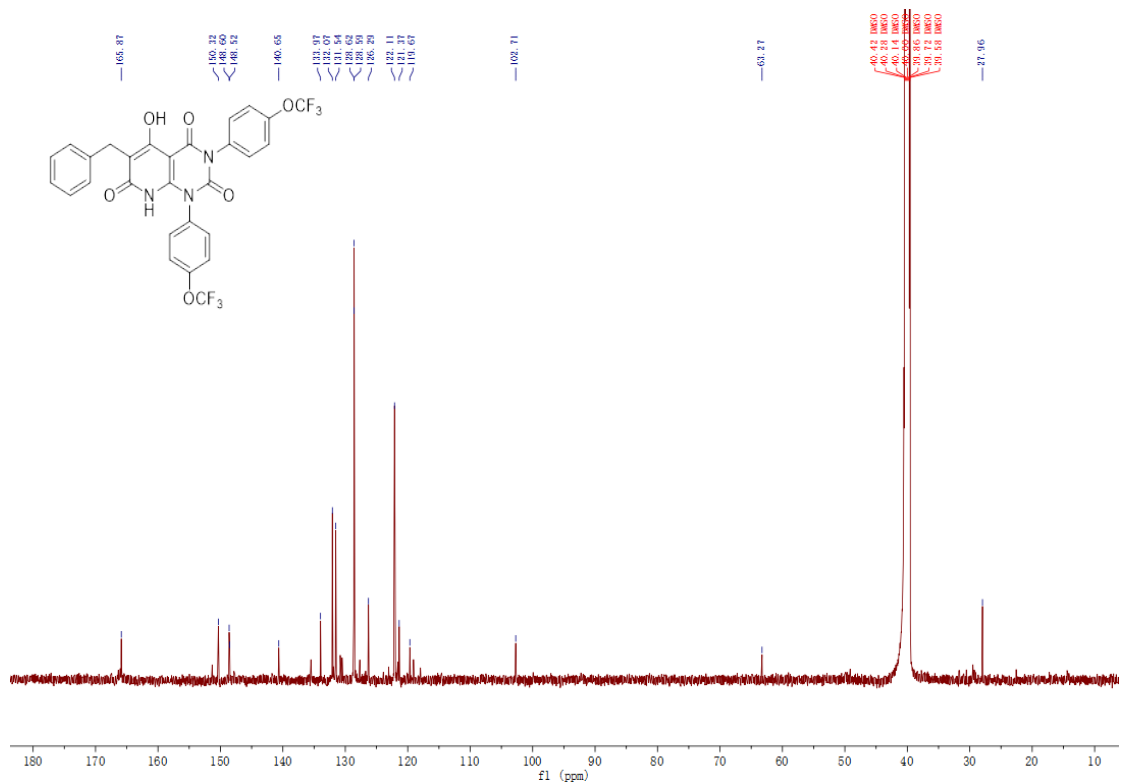

**<sup>13</sup>C NMR spectra of compound XS10**

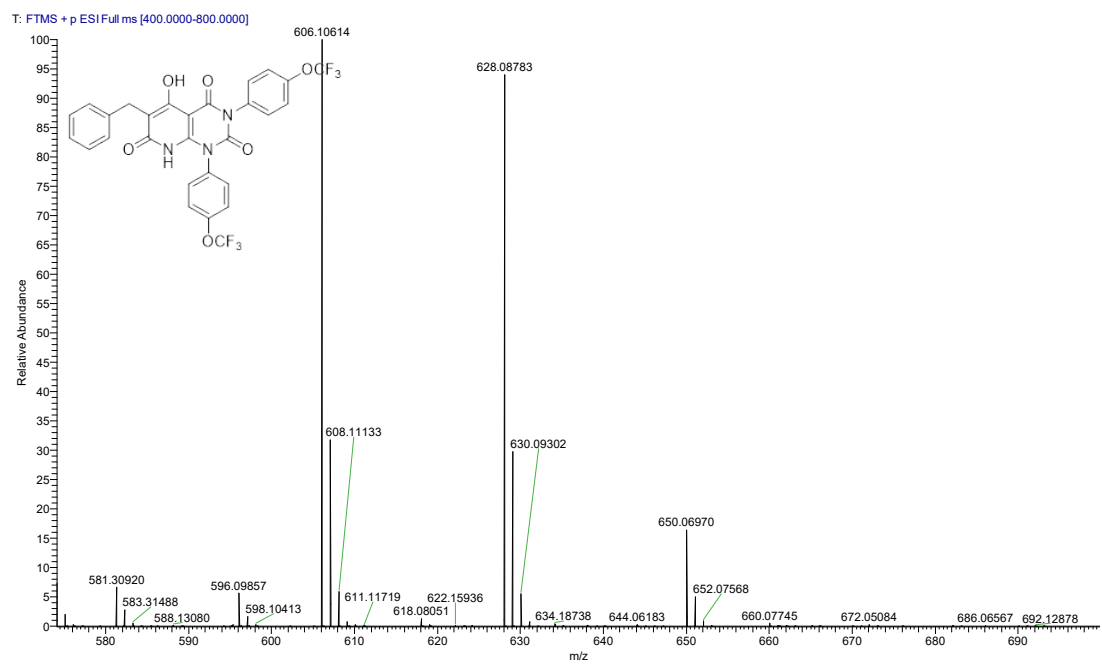

ESI-HRMS spectra of compound **XS10**

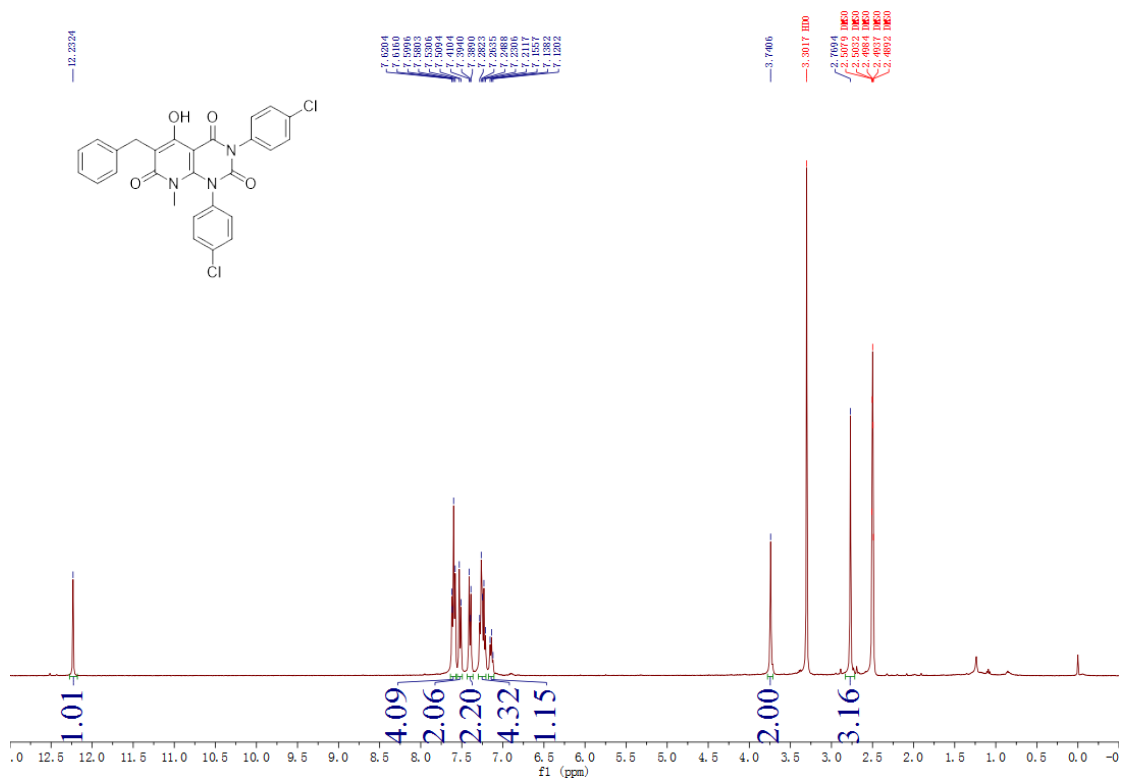

<sup>1</sup>H NMR spectra of compound **XS11**



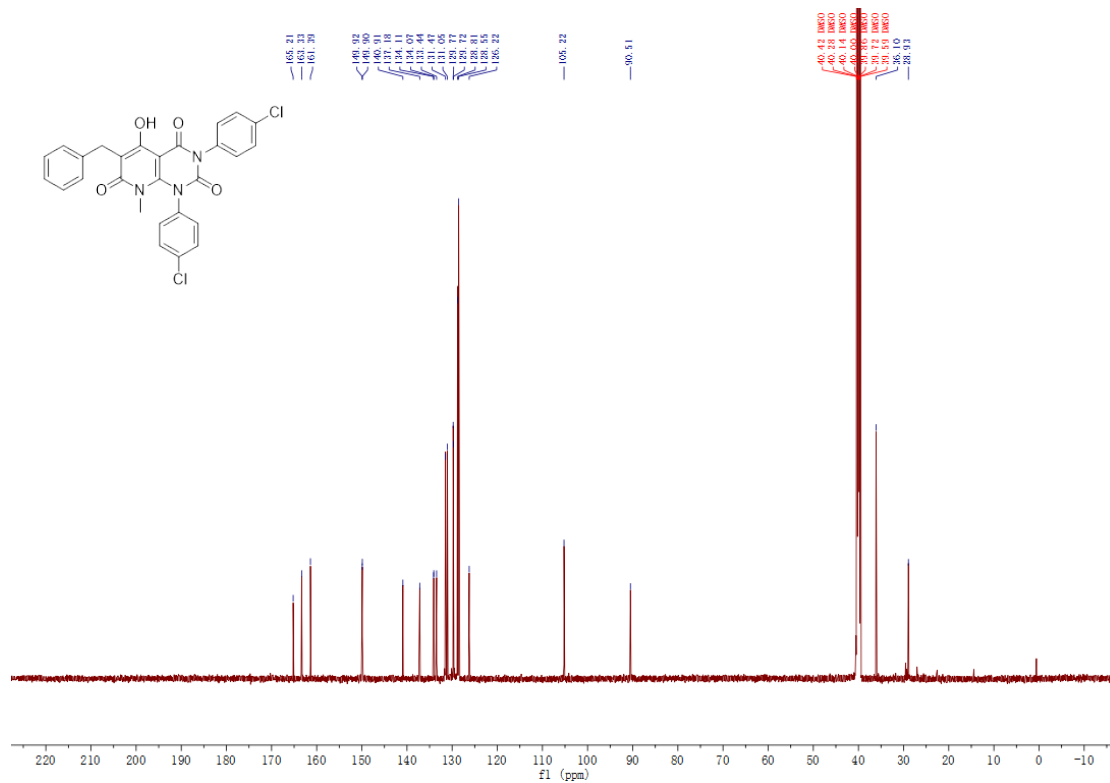

<sup>13</sup>C NMR spectra of compound XS11

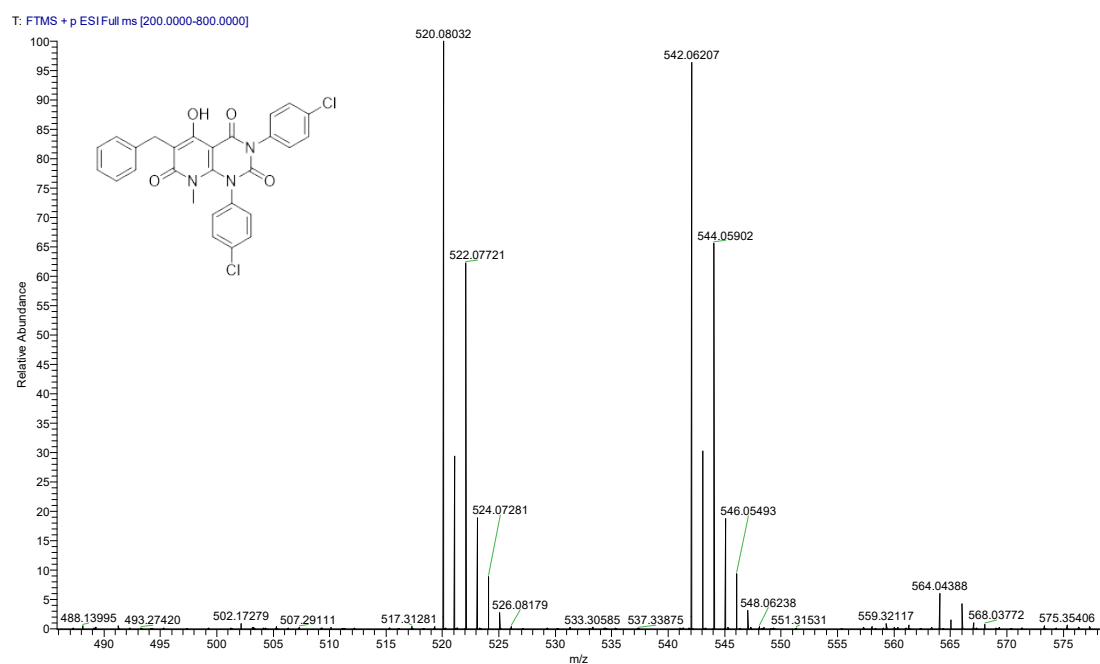

ESI-HRMS spectra of compound XS11

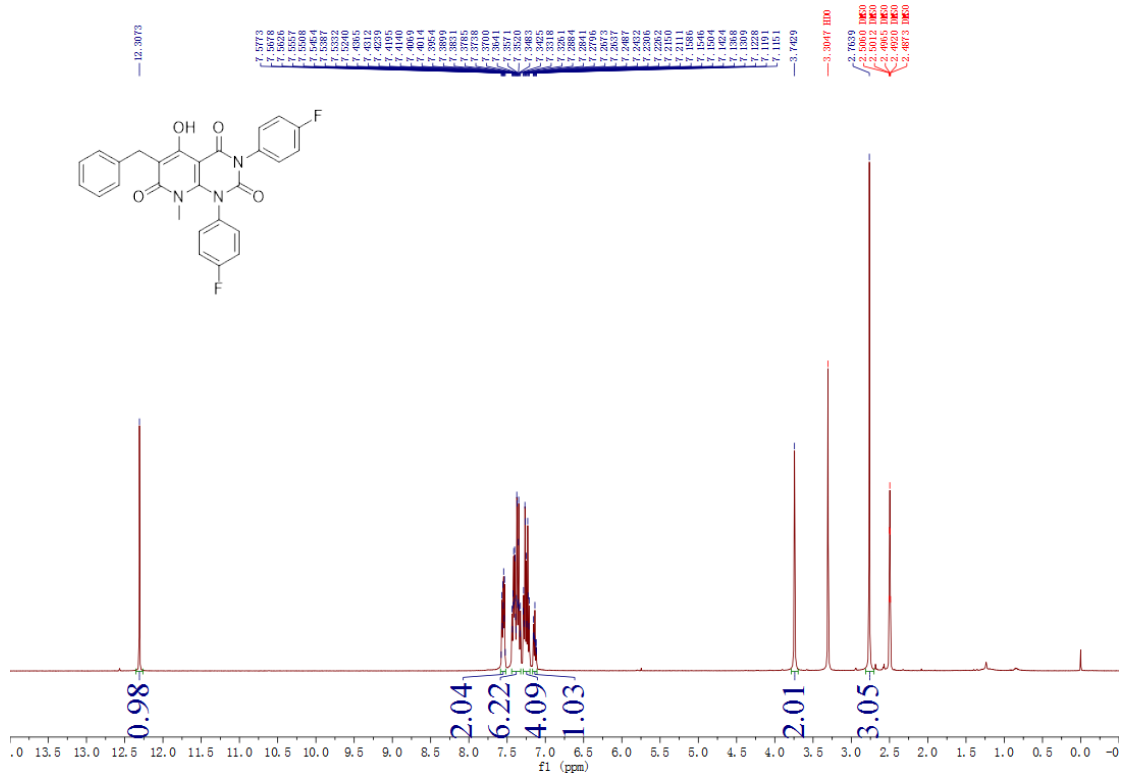

<sup>1</sup>H NMR spectra of compound XS12

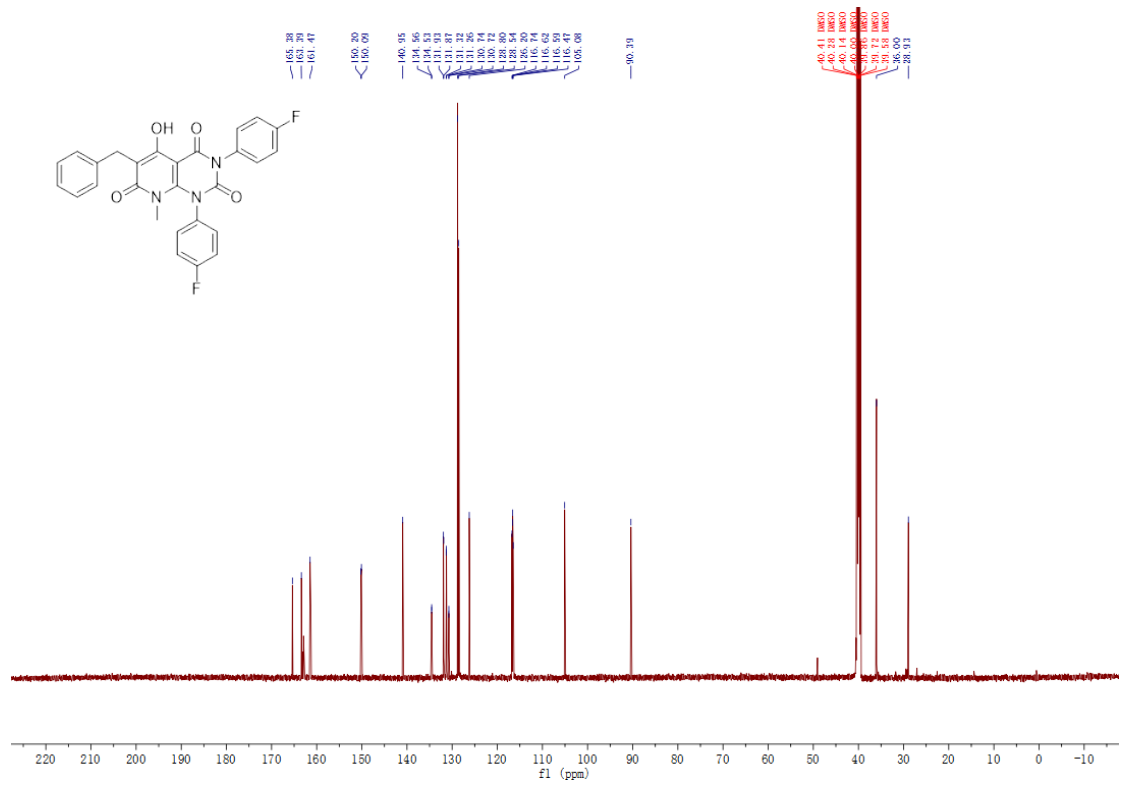

<sup>13</sup>C NMR spectra of compound XS12

T: FTMS + p ESI Full ms [200.0000-800.0000]

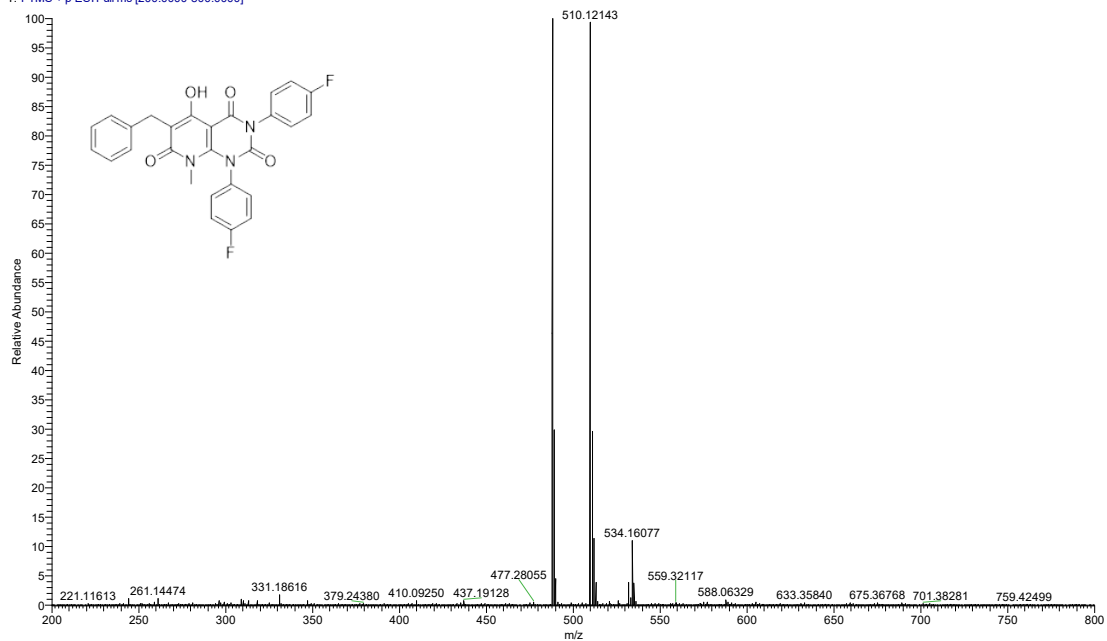

ESI-HRMS spectra of compound XS12

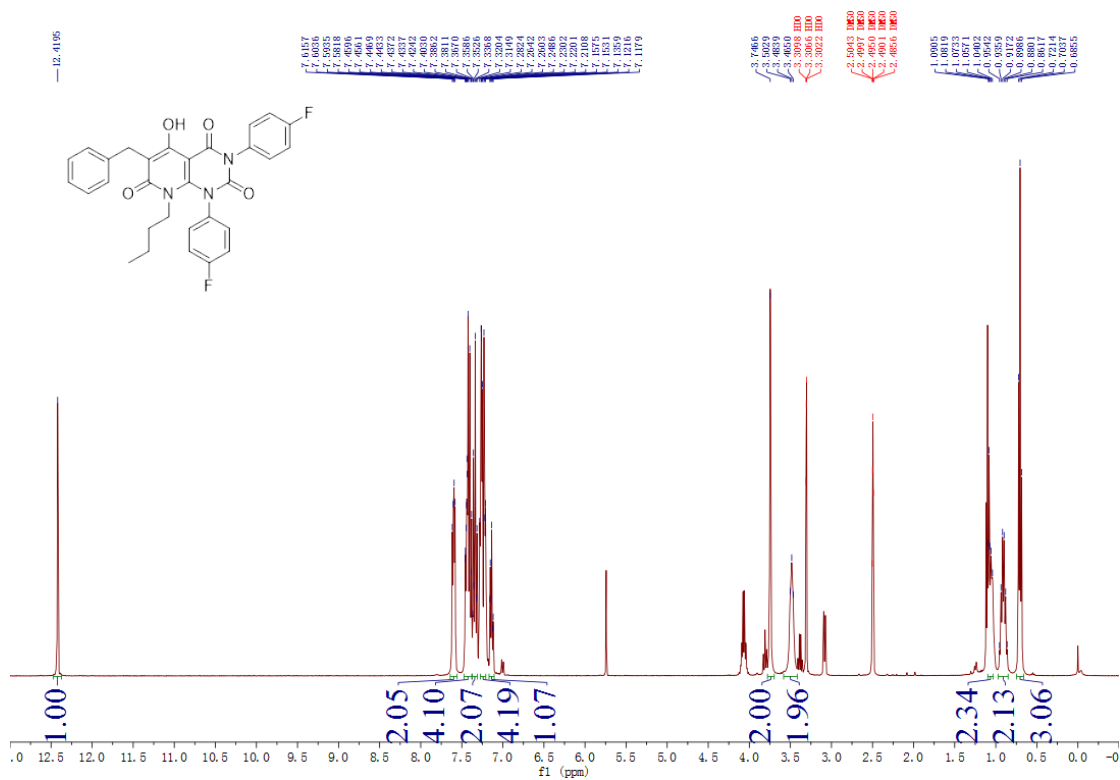

<sup>1</sup>H NMR spectra of compound XS13

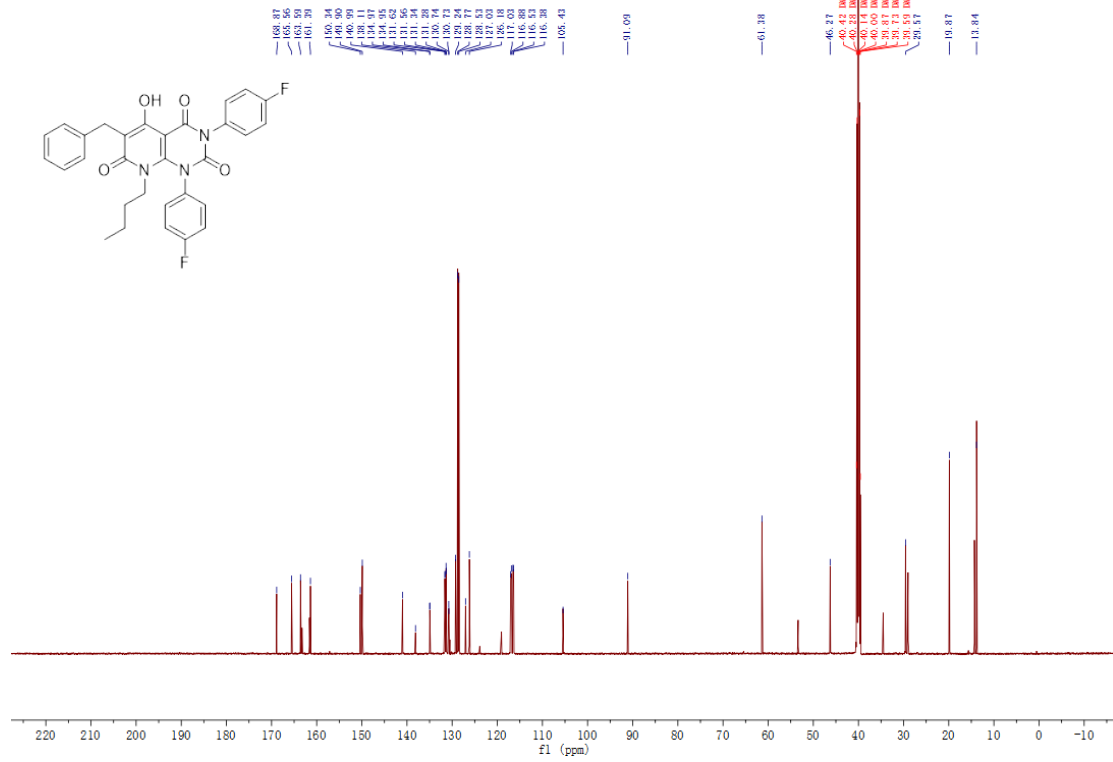

$^{13}\text{C}$  NMR spectra of compound XS13

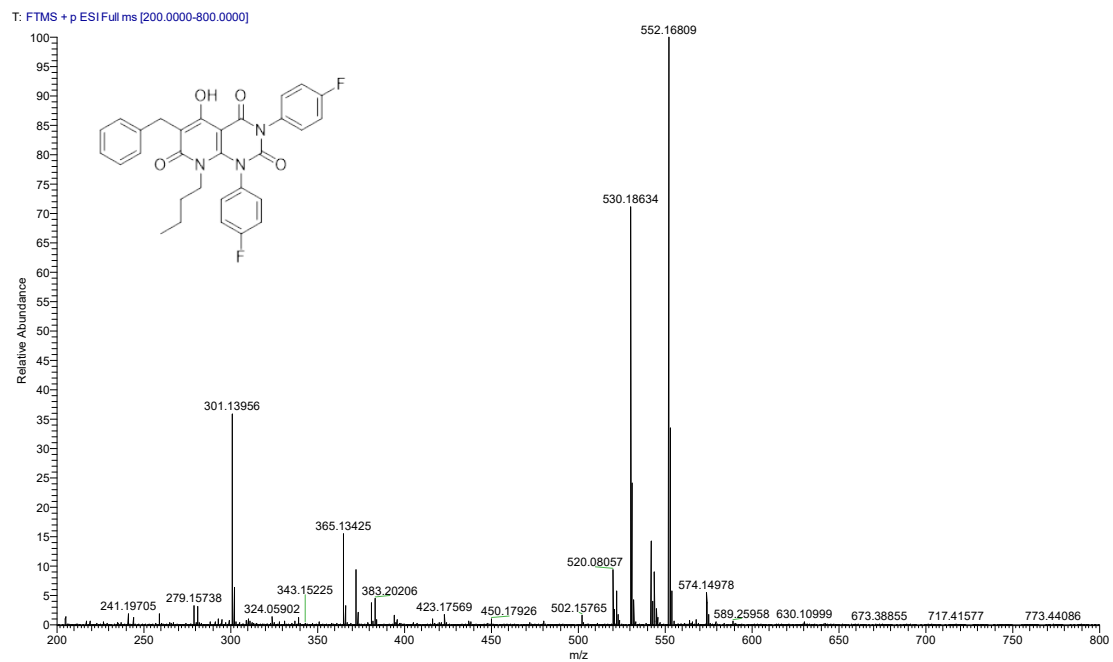

ESI-HRMS spectra of compound XS13

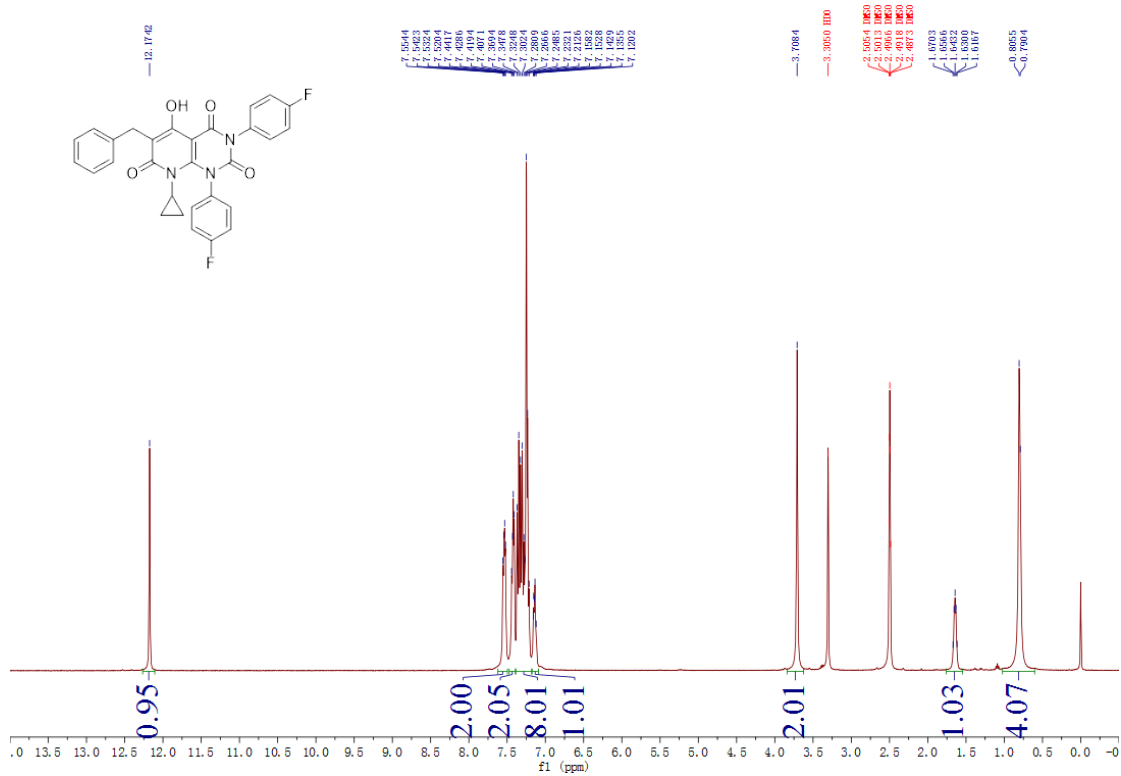

<sup>1</sup>H NMR spectra of compound XS14

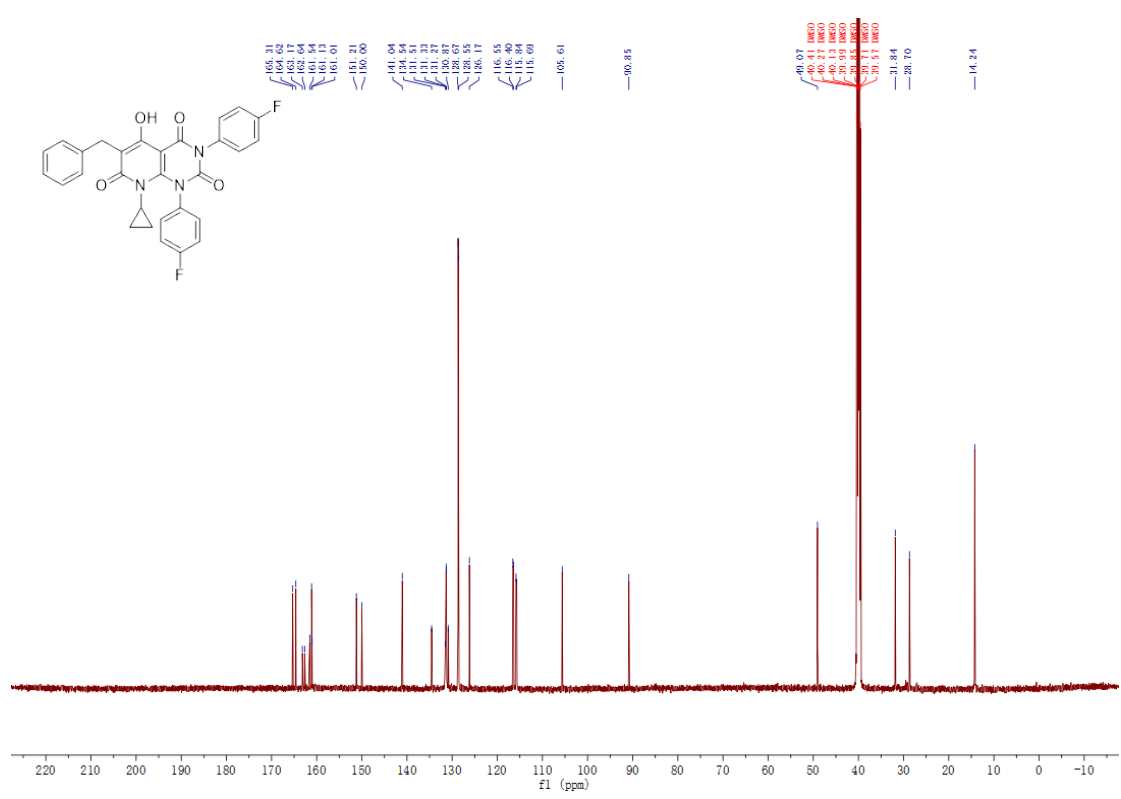

<sup>13</sup>C NMR spectra of compound XS14

T: FTMS + p ESI Full ms [300.0000-800.0000]

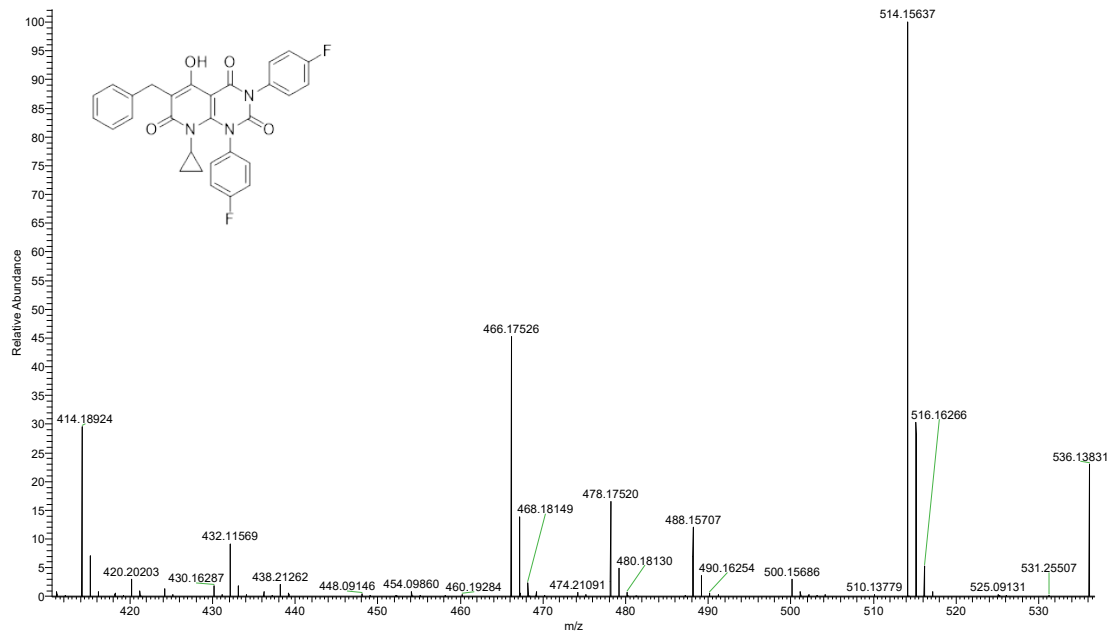

ESI-HRMS spectra of compound XS14

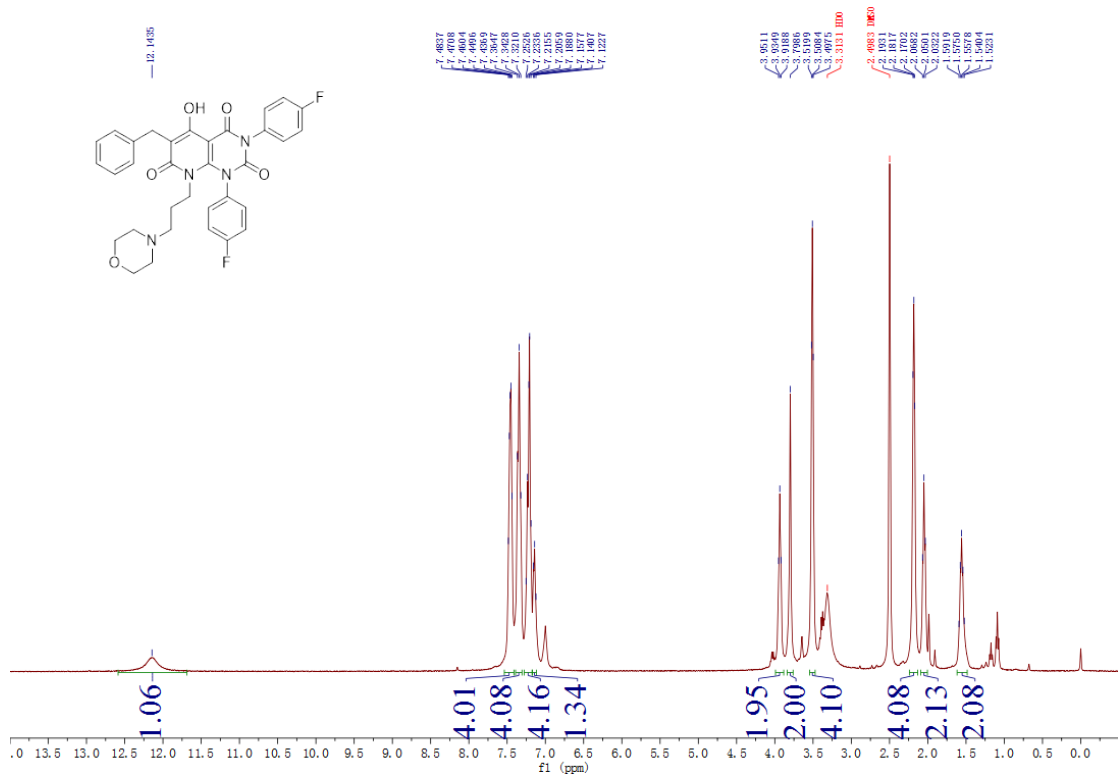

<sup>1</sup>H NMR spectra of compound XS15

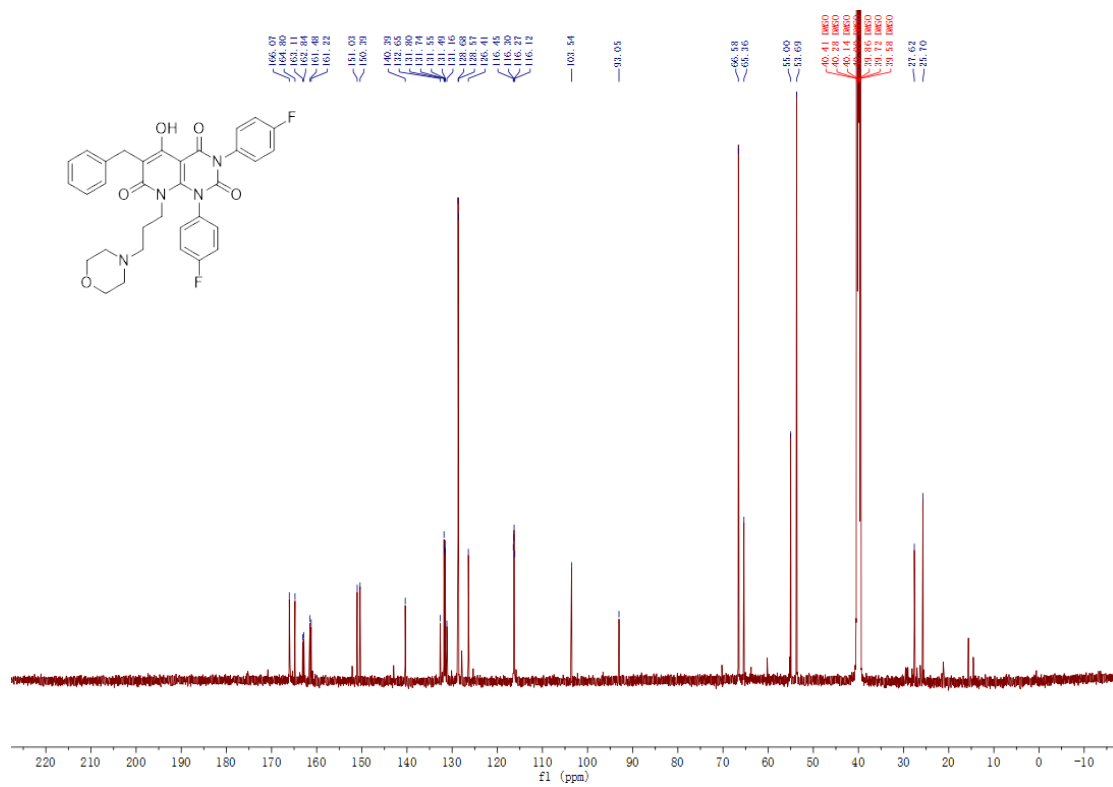

<sup>13</sup>C NMR spectra of compound XS15

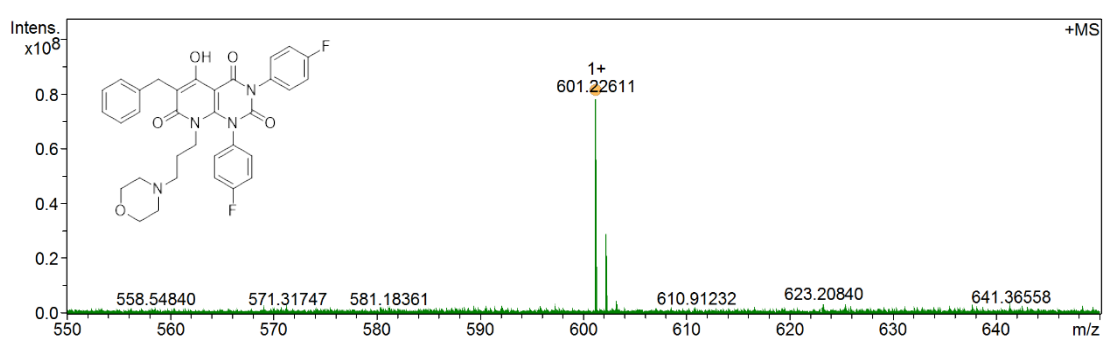

ESI-HRMS spectra of compound XS15

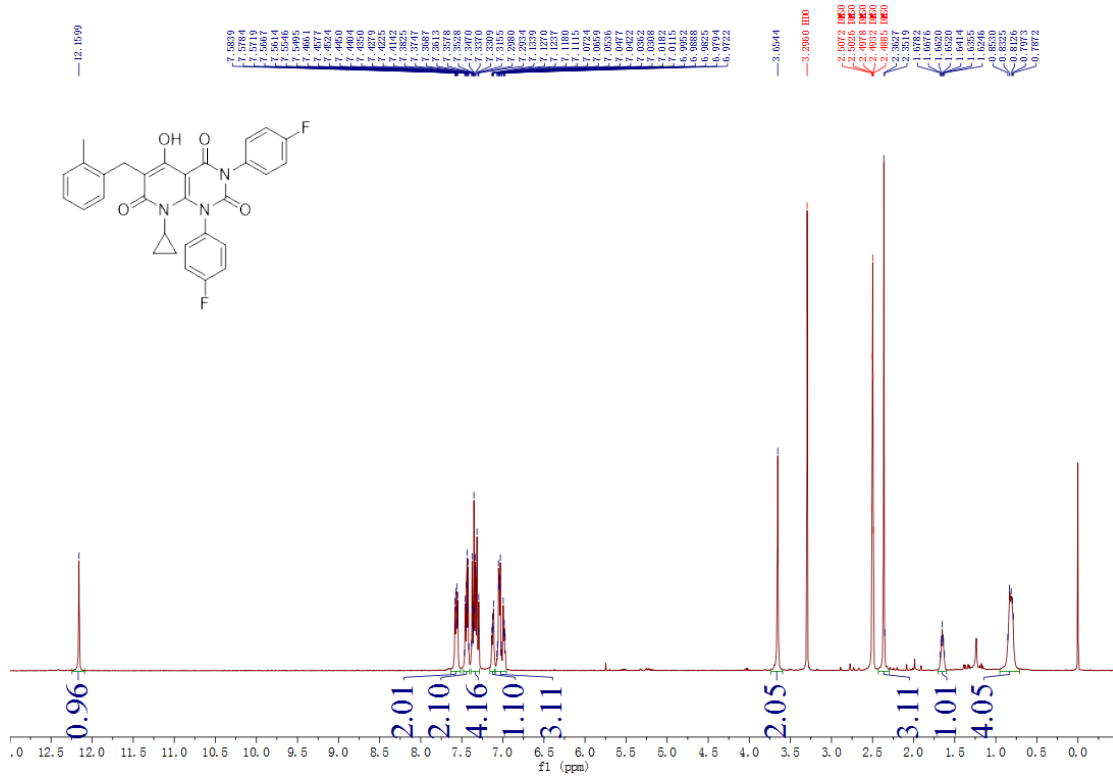

<sup>1</sup>H NMR spectra of compound XS16

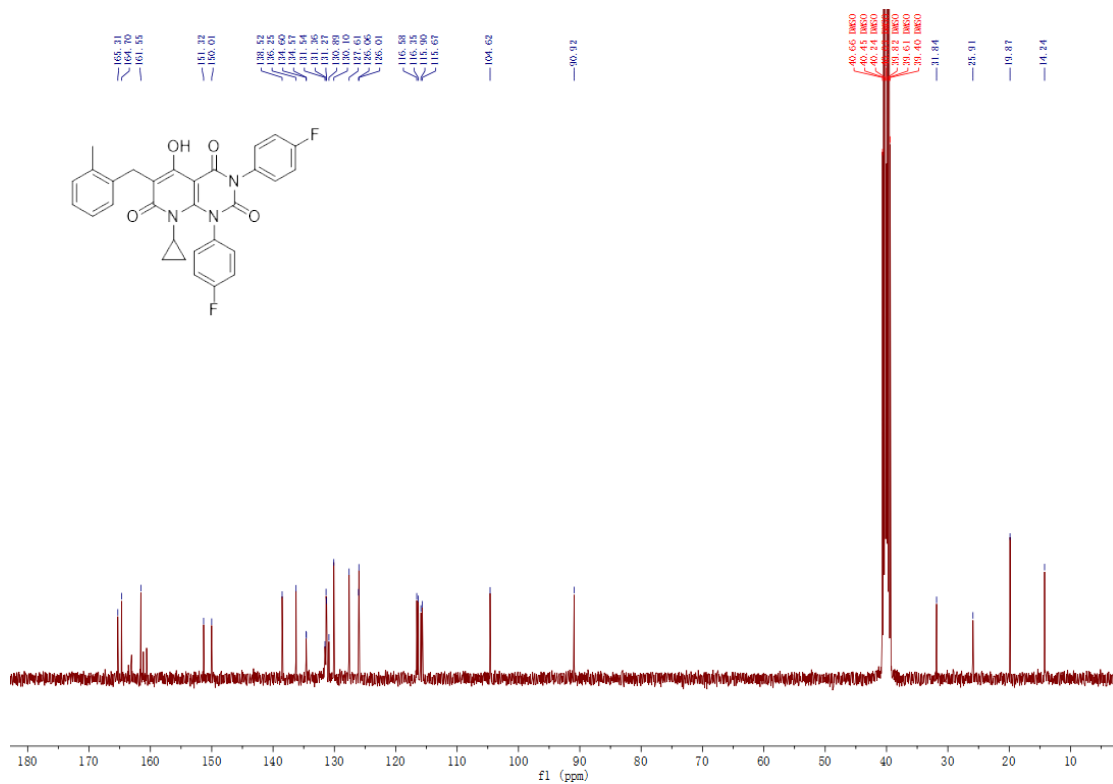

<sup>13</sup>C NMR spectra of compound XS16



T: FTMS + p ESI Full ms [300.0000-800.0000]

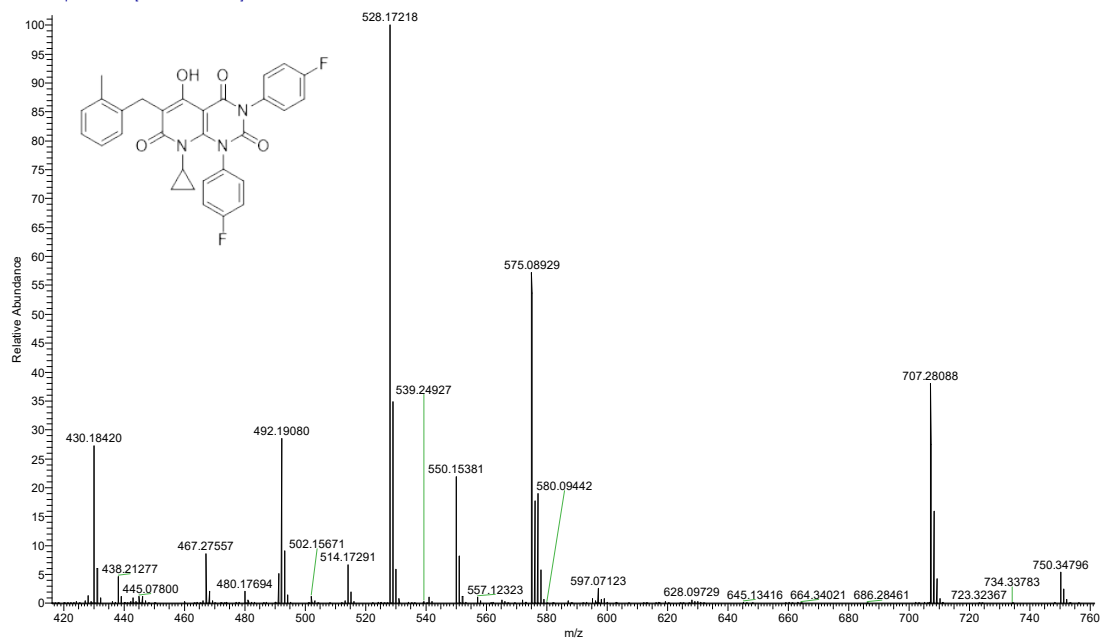

ESI-HRMS spectra of compound XS16

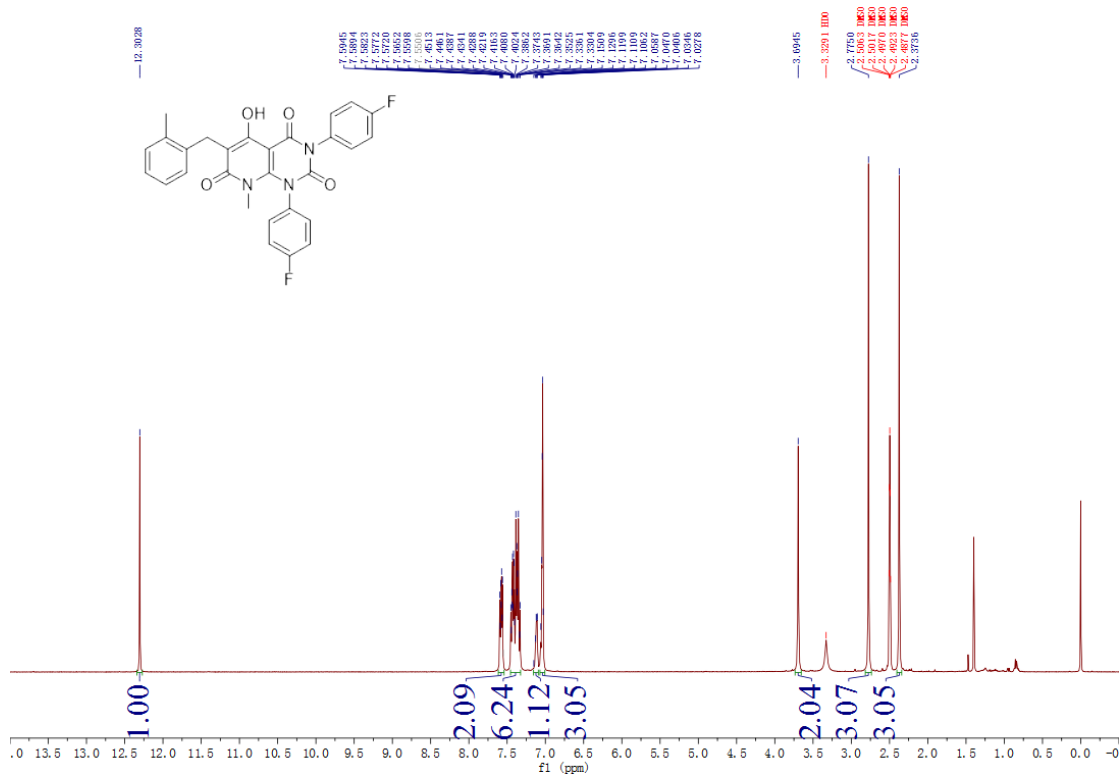

<sup>1</sup>H NMR spectra of compound XS17

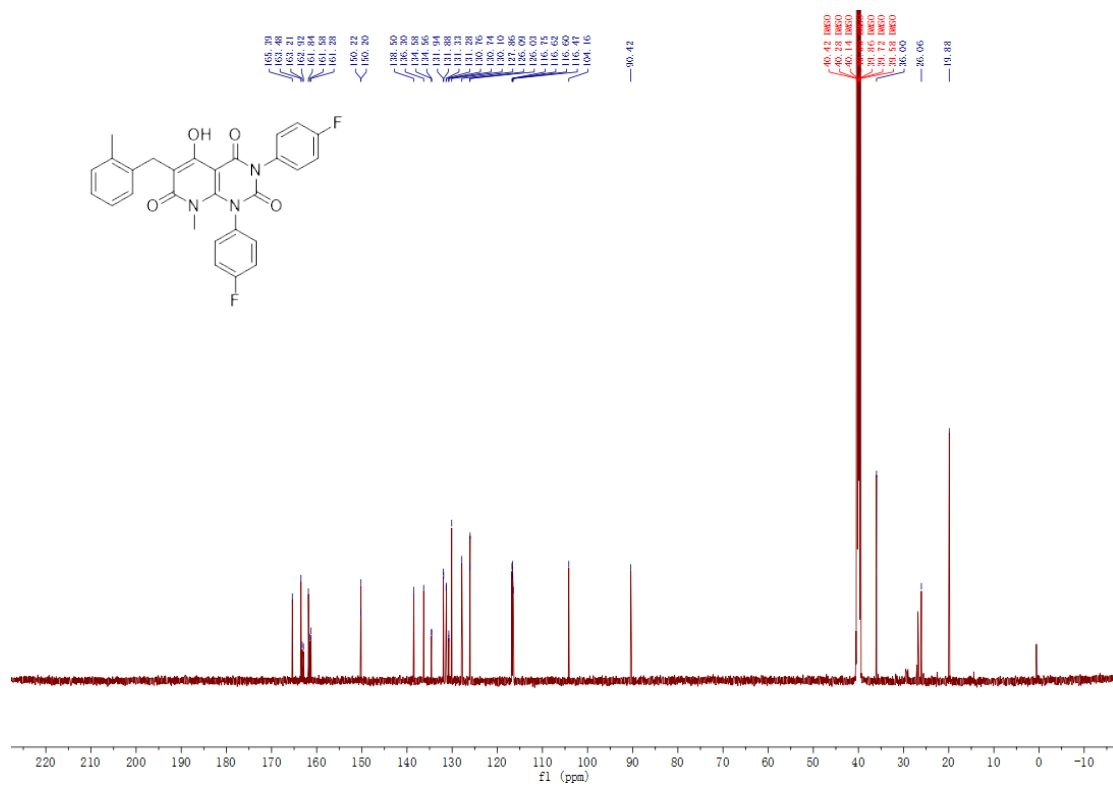

<sup>13</sup>C NMR spectra of compound XS17

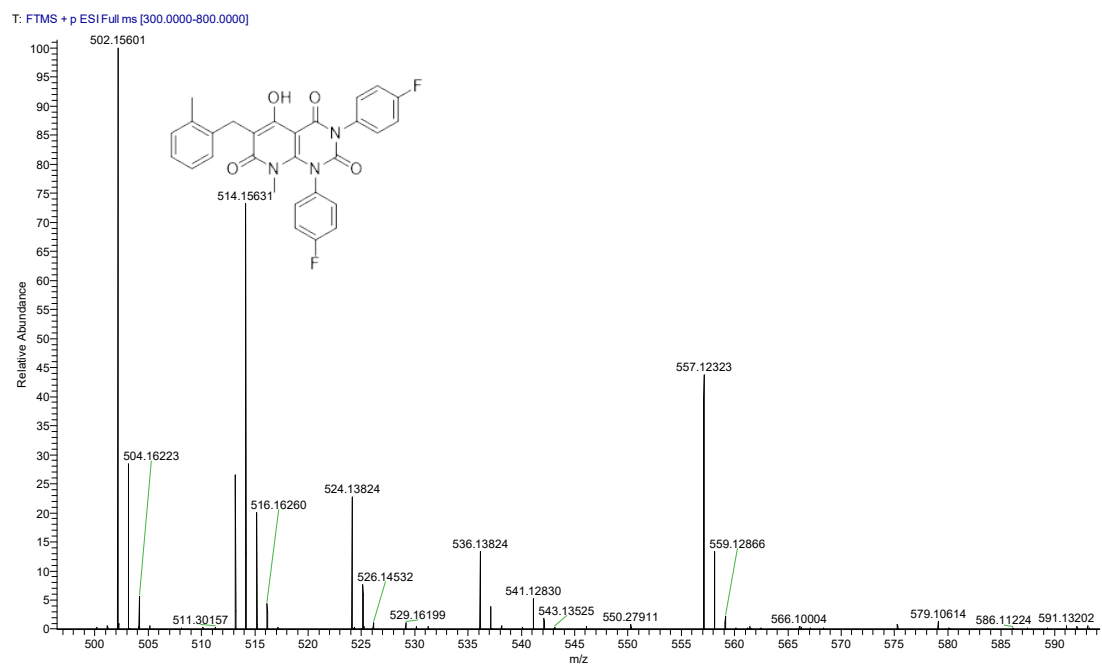

ESI-HRMS spectra of compound XS17

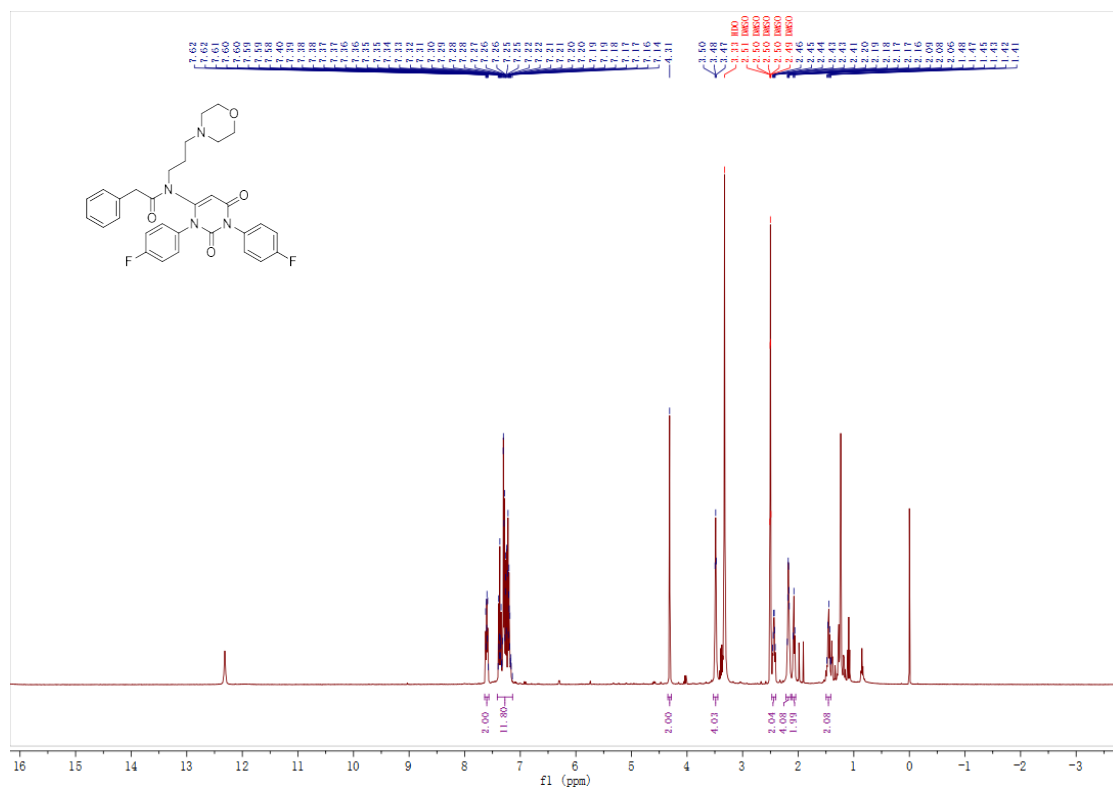

<sup>1</sup>H NMR spectra of compound XS18

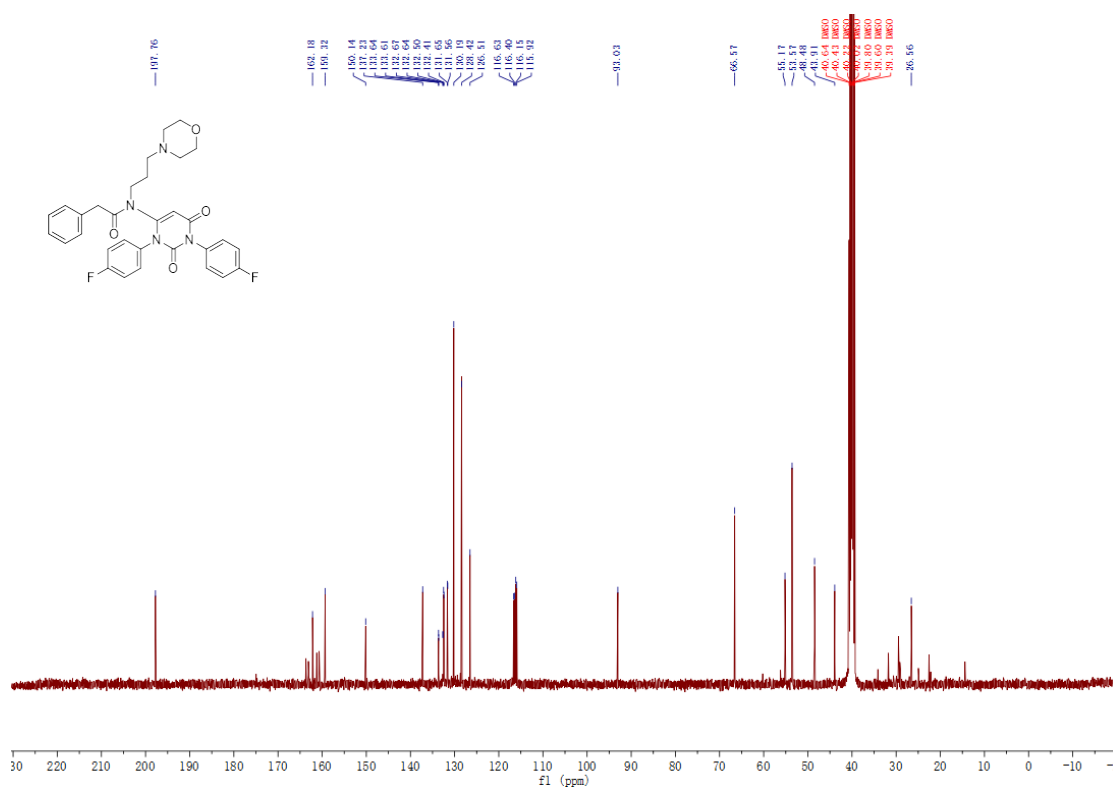

<sup>13</sup>C NMR spectra of compound XS18

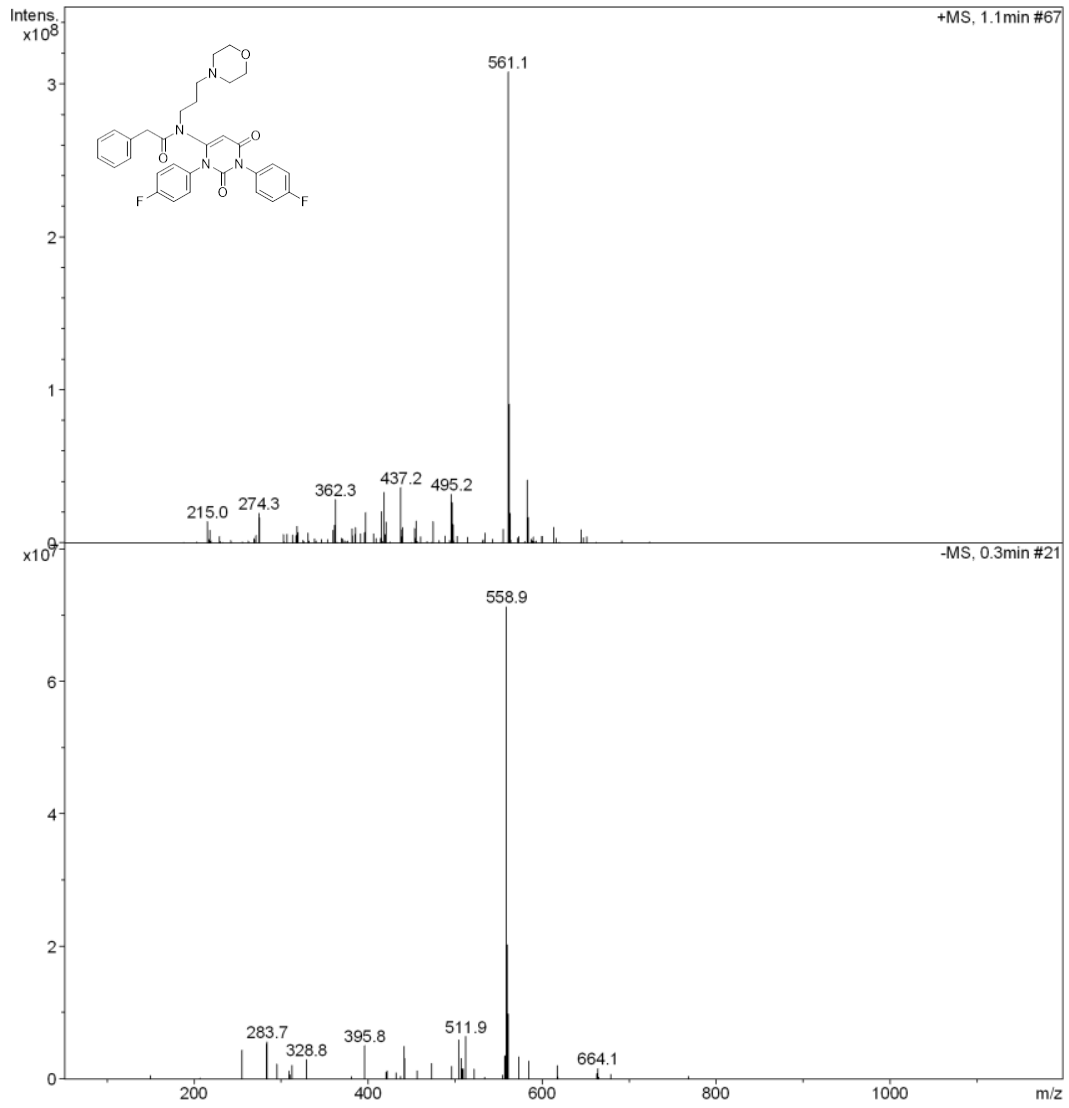

ESI-HRMS spectra of compound **XS18**



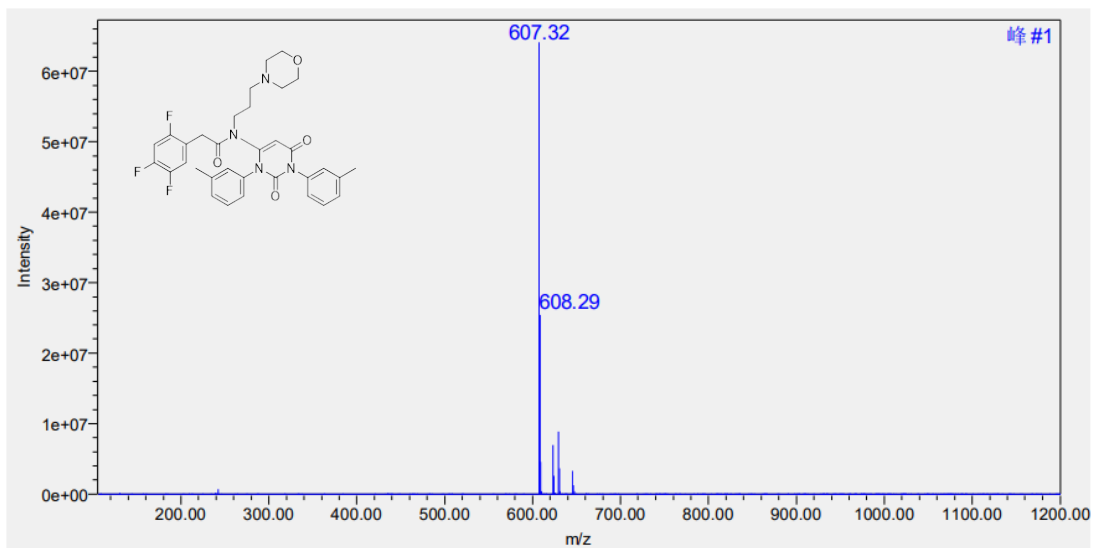

ESI-HRMS spectra of compound XS19

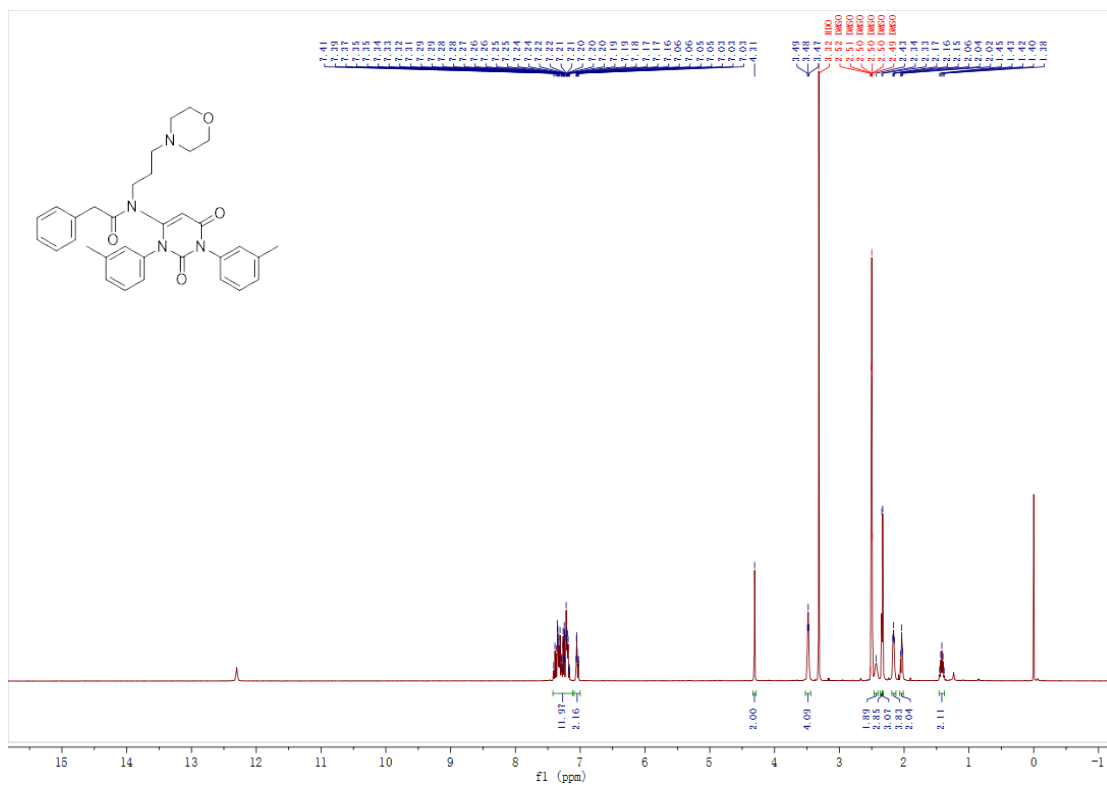

<sup>1</sup>H NMR spectra of compound XS20

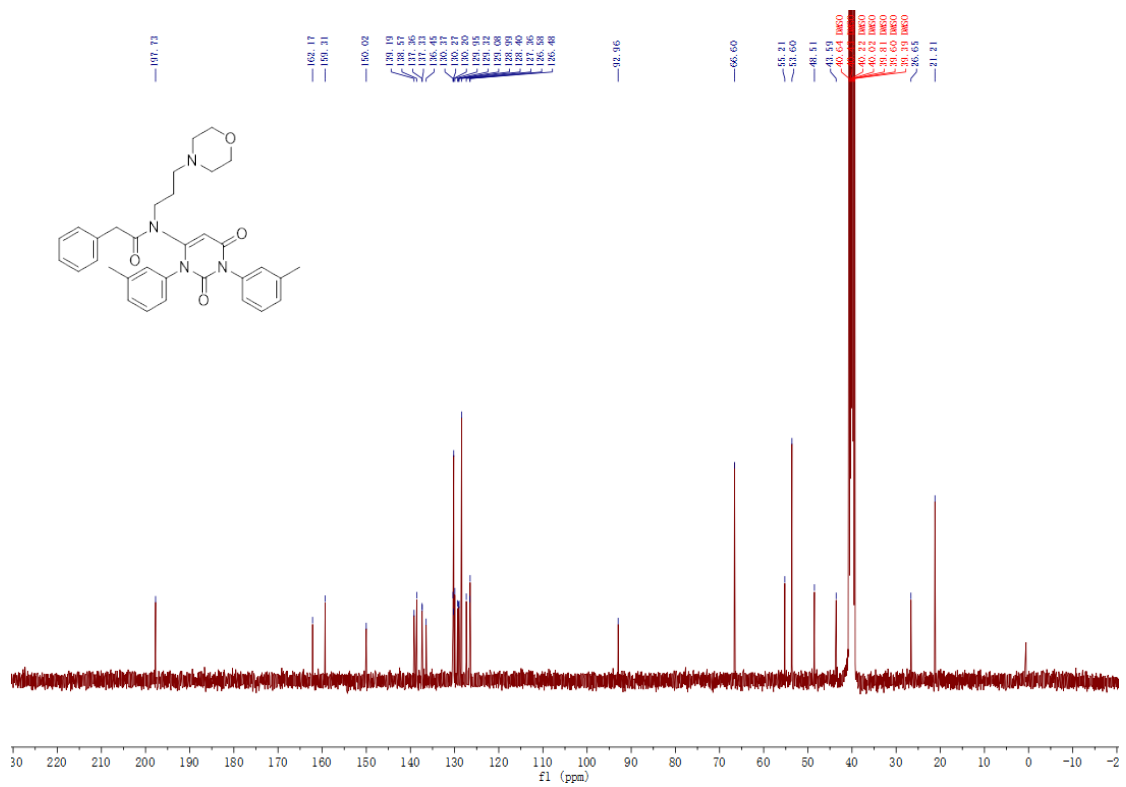

<sup>13</sup>C NMR spectra of compound XS20

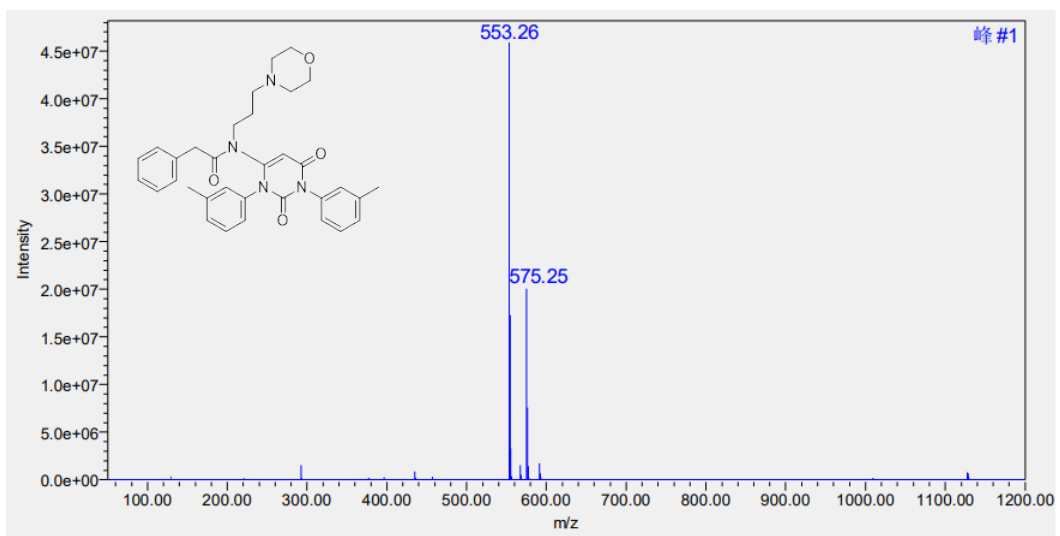

ESI-HRMS spectra of compound XS20

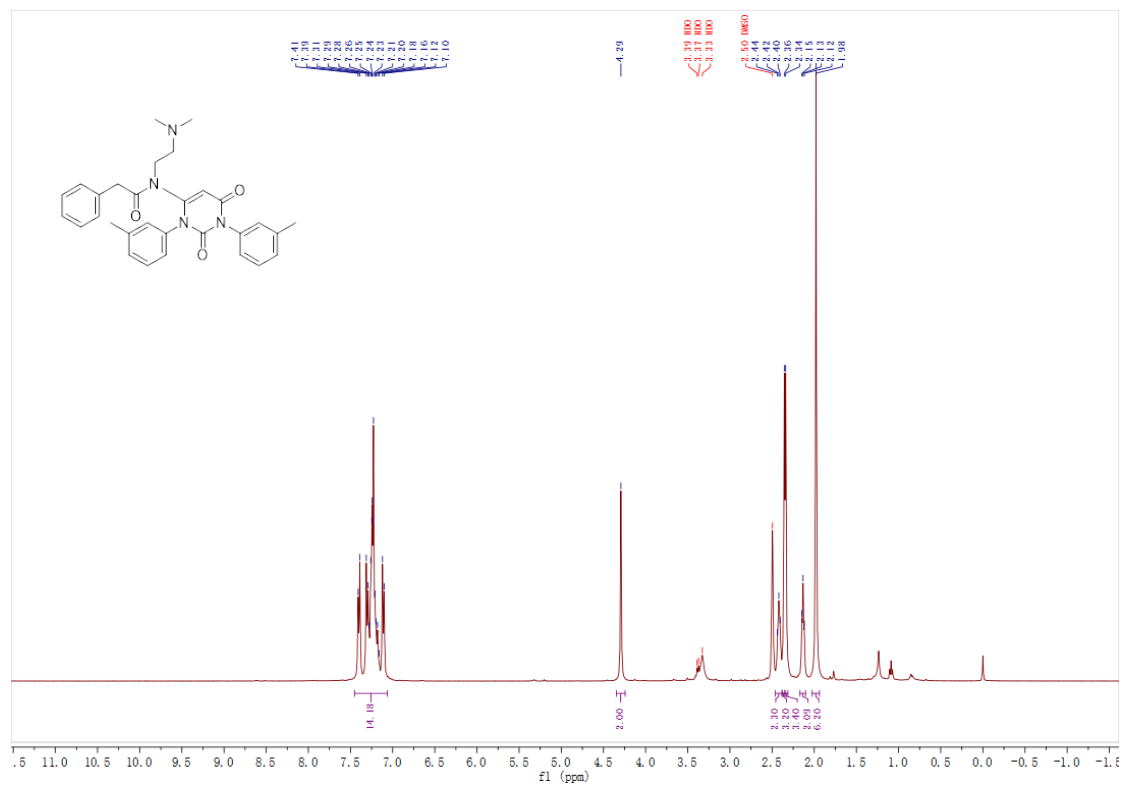

<sup>1</sup>H NMR spectra of compound XS21

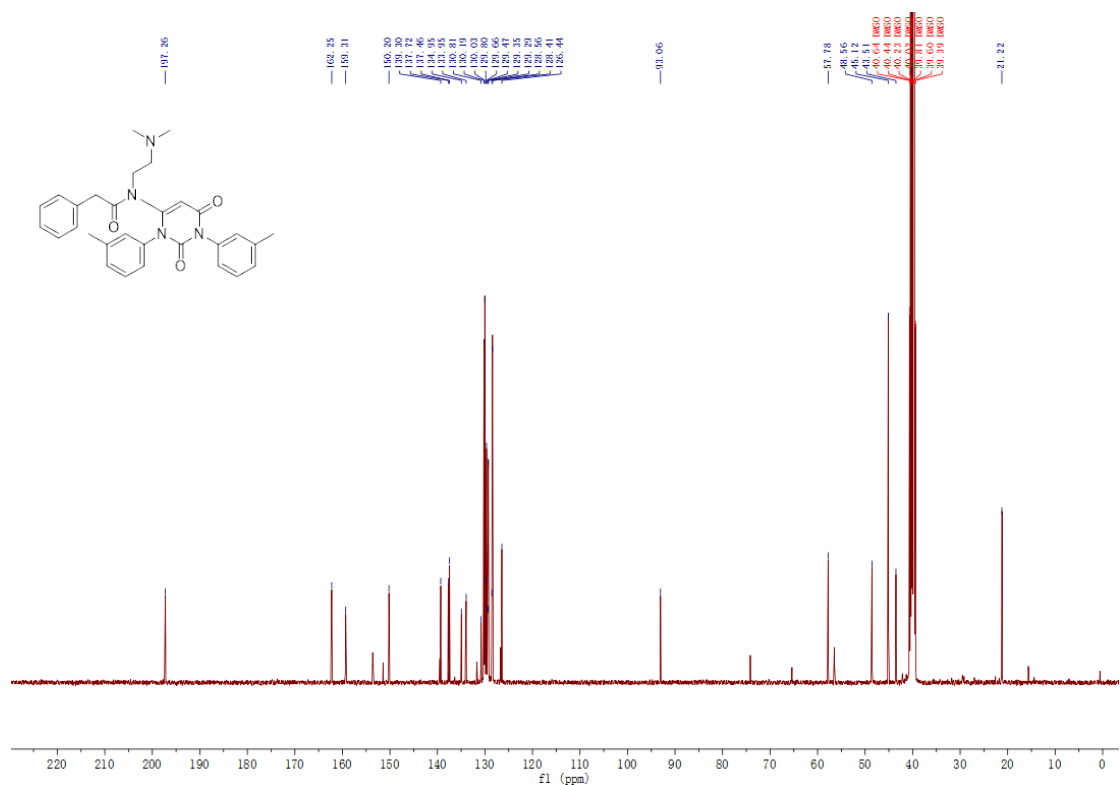

<sup>13</sup>C NMR spectra of compound XS21



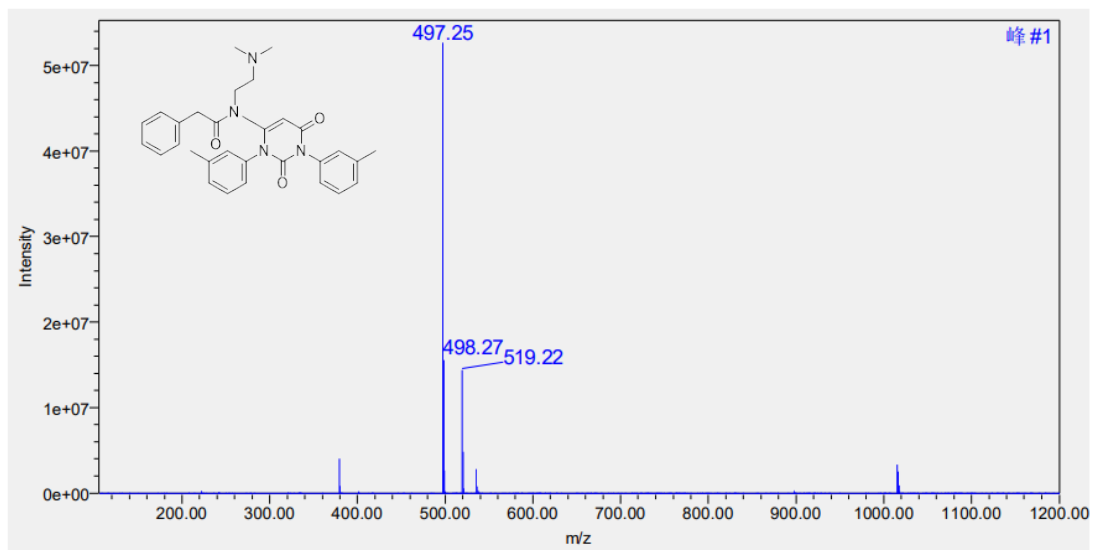

ESI-HRMS spectra of compound XS21

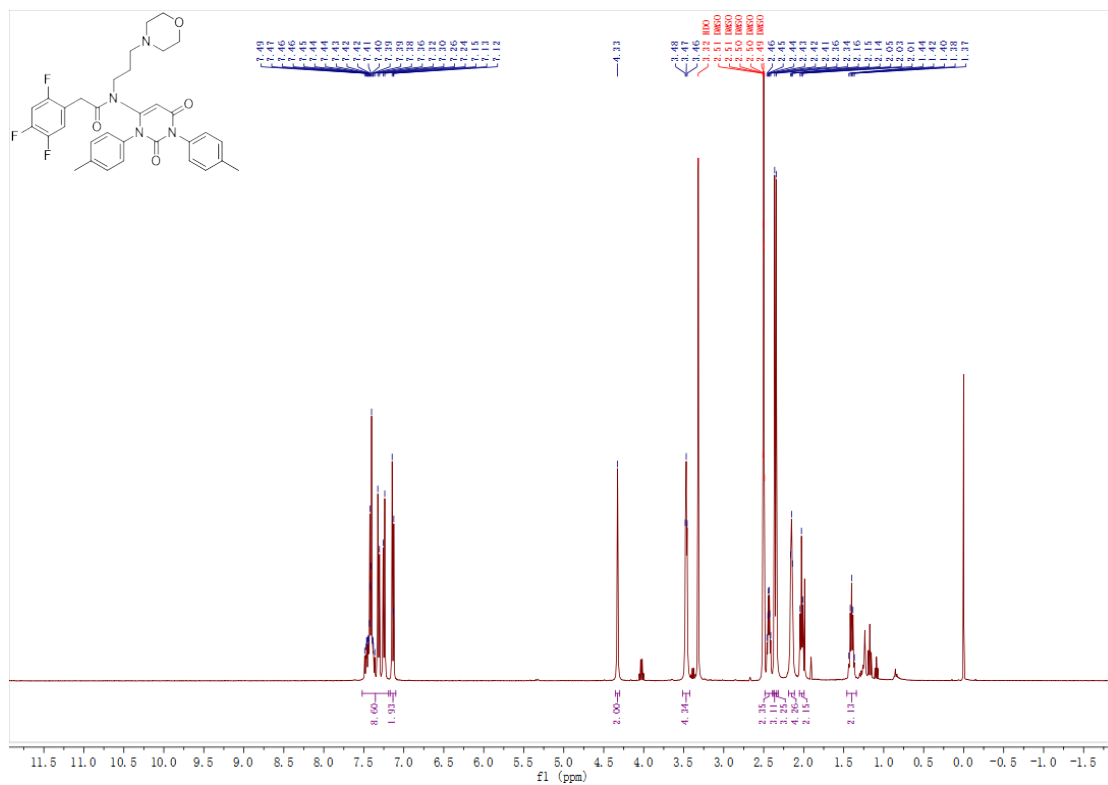

<sup>1</sup>H NMR spectra of compound XS22

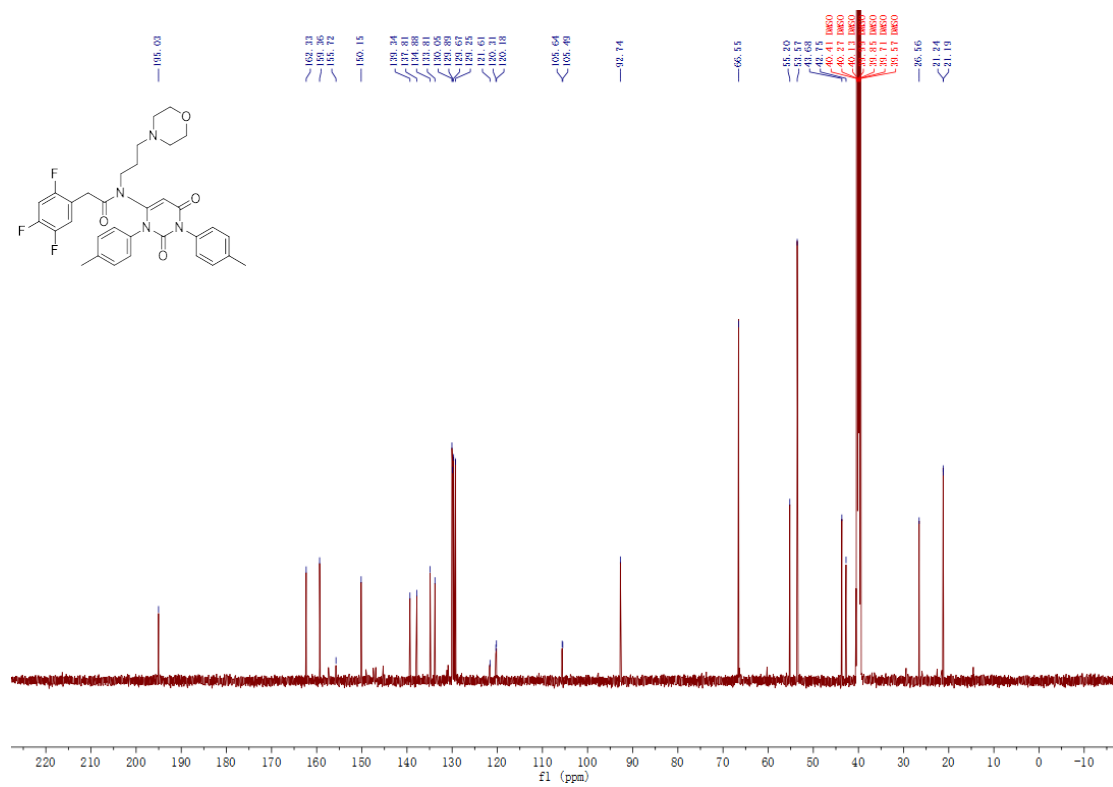

<sup>13</sup>C NMR spectra of compound XS22

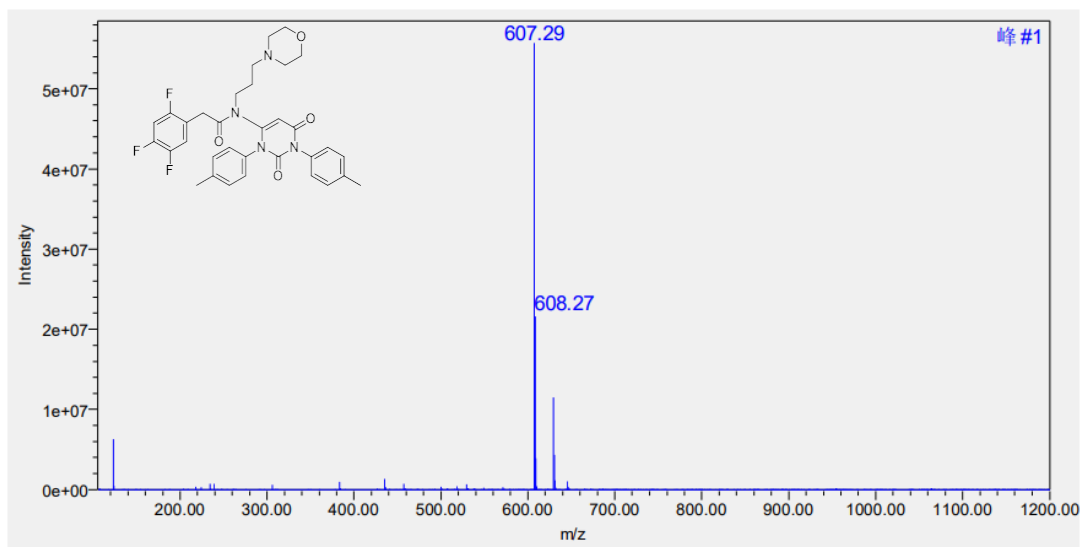

ESI-HRMS spectra of compound XS22

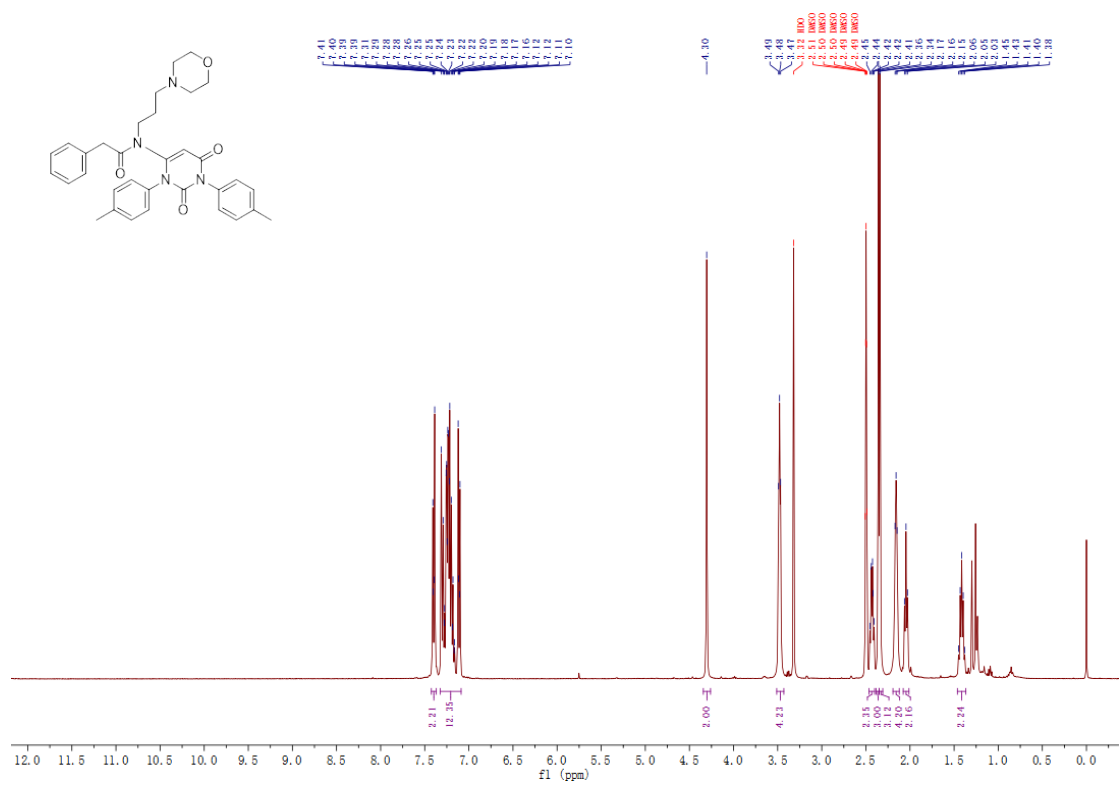

<sup>1</sup>H NMR spectra of compound XS23

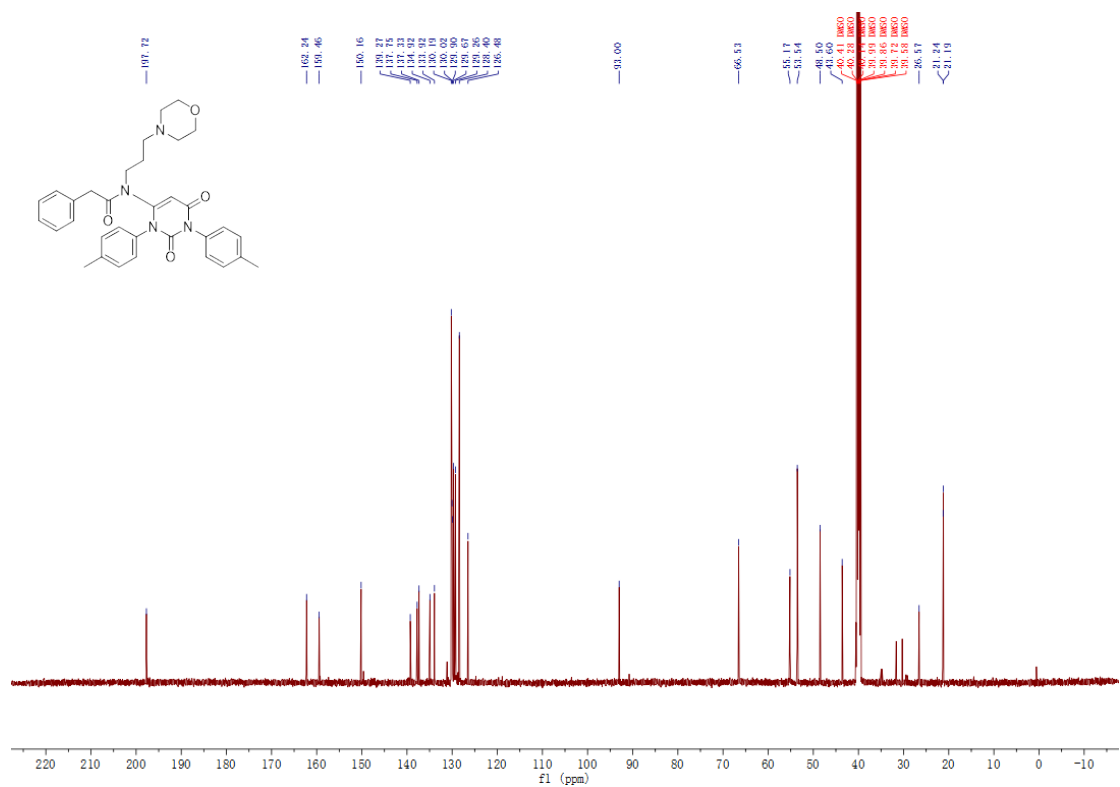

<sup>13</sup>C NMR spectra of compound XS23

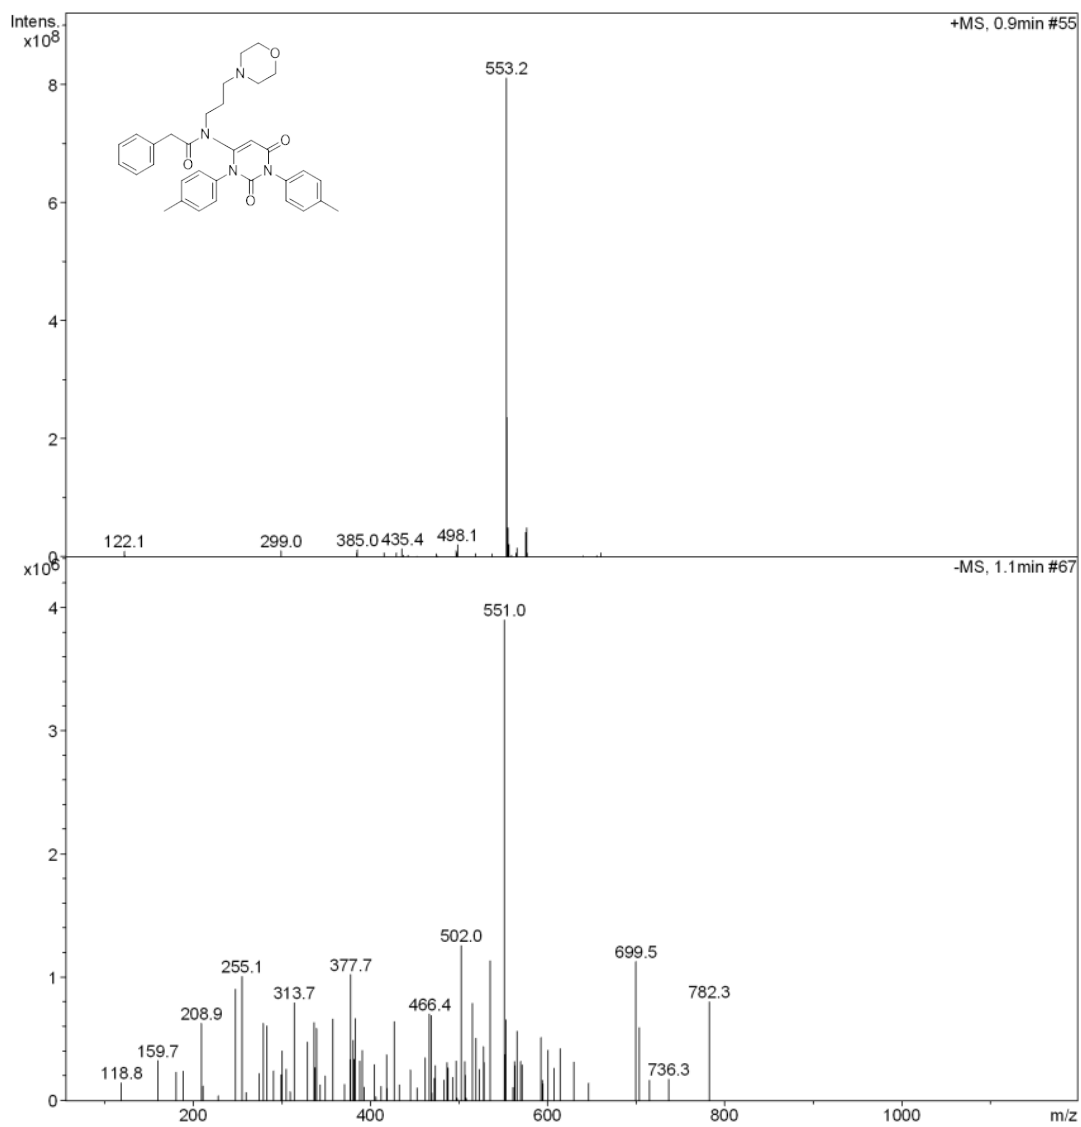

ESI-HRMS spectra of compound **XS23**

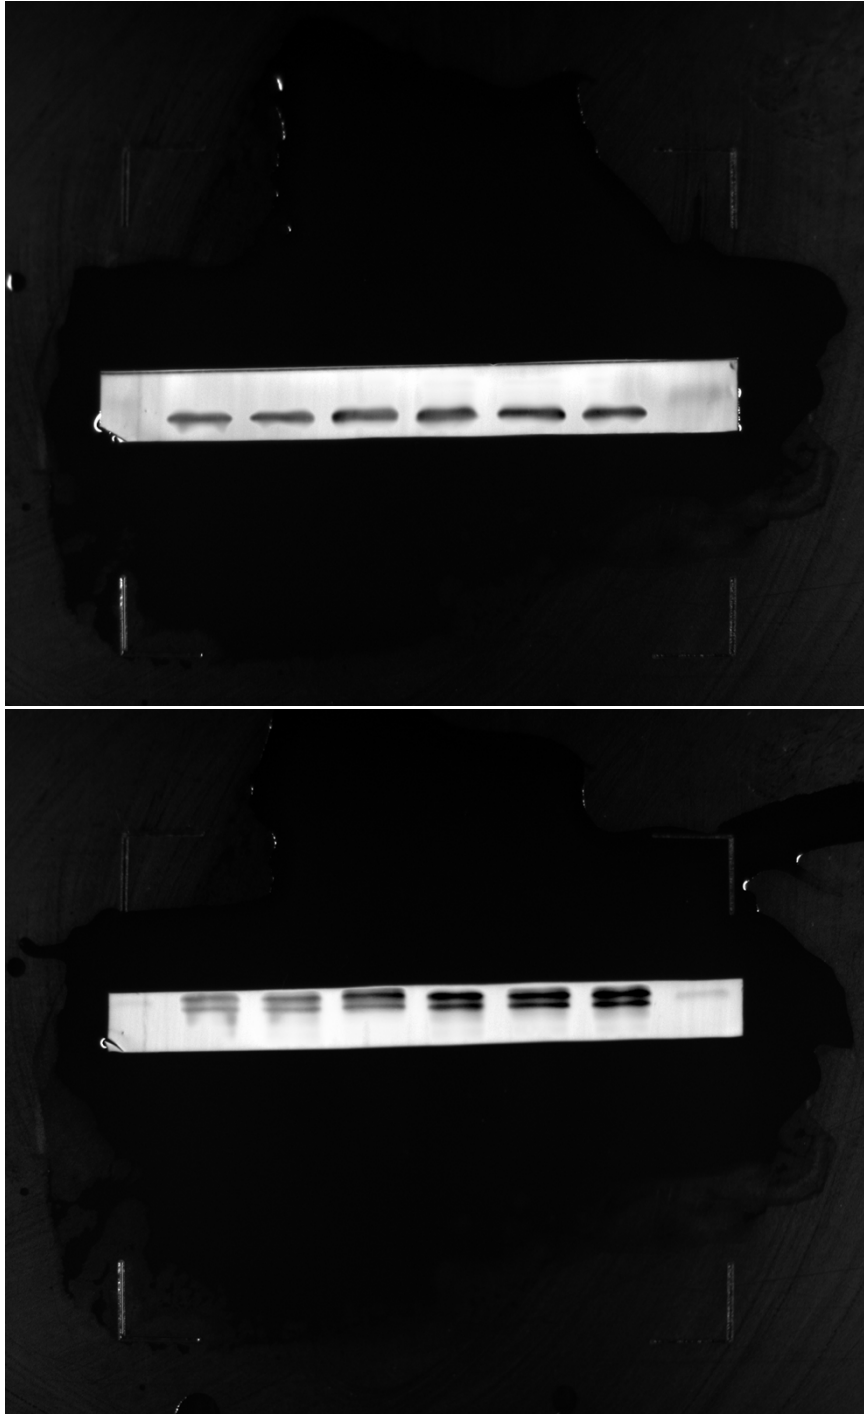

Original Western Blotting strips
